# Supplementary material for: The Gut Microbiome Profile of Lions in Etosha National Park, Namibia
Source: Research Square preprint supplement (doi:10.21203/rs.3.rs-9092464/v1), 2026-05-06
Supplement: Supplementary file 1 [file 62e2c2eca348a2e50c26d403.pdf]

# The Gut Microbiome Profile of Lions in Etosha National Park, Namibia

Carl Belger<sup>1,2</sup>, Jakob Wirbel<sup>3</sup>, Dylan Maghini<sup>2,4</sup>, Nadia Carstens<sup>5,6</sup>,  
Ansia van Coller<sup>5</sup>, James C. Beasley<sup>7</sup>, Jörg Melzheimer<sup>8</sup>,  
Aaron Y. Berkman<sup>2,6</sup>, Willem Maartin Strauss<sup>9,10</sup>, Robyn S. Hetem<sup>1,10</sup>,  
Scott Hazelhurst<sup>2,11</sup>

<sup>1</sup>School of Animal, Plant and Environmental Science, University of the Witwatersrand, Johannesburg, South Africa.

<sup>2</sup>Sydney Brenner Institute for Molecular Bioscience, University of the Witwatersrand, Johannesburg, South Africa.

<sup>3</sup>Division of Hematology, Department of Medicine, Stanford University, Stanford, CA, United States.

<sup>4</sup>Department of Human Genetics, Stanford University, Stanford, CA, United States.

<sup>5</sup>Genomics Platform, South African Medical Research Council, Cape Town, South Africa.

<sup>6</sup>Division of Human Genetics, National Health Laboratory Service and School of Pathology, Faculty of Health Sciences, University of the Witwatersrand, Johannesburg, South Africa.

<sup>7</sup>Savannah River Ecology Laboratory, Warnell School of Forestry and Natural Resources, University of Georgia, Aiken, South Carolina, United States of America.

<sup>8</sup>Department Evolutionary Ecology, Leibniz Institute for Zoo and Wildlife Research, Berlin, Germany.

<sup>9</sup>Applied Behavioural Ecology and Ecosystem Research Unit, Department of Environmental Science, University of South Africa, Johannesburg, South Africa.

<sup>10</sup>School of Biological Sciences, University of Canterbury, New Zealand.

<sup>11</sup>School of Electrical & Information Engineering, University of the Witwatersrand, Johannesburg, South Africa.

Contributing authors: [carlwbelger@gmail.com](mailto:carlwbelger@gmail.com); [scott.hazelhurst@wits.ac.za](mailto:scott.hazelhurst@wits.ac.za);

## Abstract

**Background:** The gut microbiome plays a crucial role in carnivore ecology, diet, and health, yet remains poorly characterised in African lions (*Panthera leo melanochaita*). Previous studies of lion microbiomes have primarily focused on small numbers of captive individuals maintained on controlled diets of Asian origin, reporting Fusobacteriota and Firmicutes as dominant phyla. Some recent literature has begun to describe microbiome composition in free-living African lions; however, genome-resolved analyses and detailed functional characterisation of the wild African lion gut microbiome remain lacking.

**Results:** We present the first comprehensive gut microbiome analysis of free-living African lions, including novel MAGs generated from examining 23 fresh faecal samples from 20 individuals

055 in Etosha National Park, Namibia. The African lion gut was dominated by Bacteroides (22.1%)  
056 and Phocaeicola (13.3%) — two related genera — contrasting sharply with the captive lions  
057 where Fusobacterium (Bhopal, India) and Firmicutes (Rotterdam, Netherlands) predominate.  
058 This divergence likely reflects dietary differences, captivity effects and possibly allopatric separation.  
059 While recent work has begun to characterise taxonomic composition in wild African  
060 lions, our study extends these findings through the reconstruction of 318 bacterial and 102  
061 viral metagenome-assembled genomes (MAGs) from combined short- and long-read sequencing  
062 data. Most MAGs shared <95% average nucleotide identity with existing reference genomes,  
063 indicating largely novel species. Supplementing the GTDB database with these MAGs reduced  
064 unclassified reads from 24.5% to 9.2%, demonstrating the substantial gaps in existing carnivore  
065 gut microbiome databases. Functional analysis revealed metabolic pathway enrichment, particularly  
066 for purine metabolism—critical for processing the lions’ high-purine diet—with nearly  
067 complete pathways for degrading adenine and guanine to urea.

067 **Conclusions:** This study provides the first in depth description of the microbial taxa in the  
068 African lion gut microbiome. Genera in the Bacteroidaceae family dominated. There are large  
069 differences with the metagenomics of the  $n = 3, 4$  hybrid and Asiatic lions on controlled  
070 diets reported in prior studies. The discovery of over 300 novel MAGs significantly expands  
071 microbial reference databases and underscores the unique and understudied nature of apex  
072 carnivore microbiomes. These findings show critical microbial contributions to carnivore nutrition  
073 and establish a foundation for microbiome-based approaches to wildlife health monitoring and  
074 conservation management of threatened lion population.

075 **Keywords:** Panthera Leo, microbiome, Namibia, conservation, metagenomics

## 079 1 Background

081 Microbial communities in the gut are linked to key health factors such as diet and disease (McKen-  
082 ney et al., 2018; Trevelline et al., 2019). The human (Almeida et al., 2019) and murine (Walter  
083 et al., 2020) gut microbiomes are arguably the most well understood of mammals while the  
084 microbiomes of wild animals, especially large carnivores, remain largely unexplored (Paleo-López  
085 et al., 2026). Characterising microbiomes of free-living mammals, particularly those species of  
086 conservation concern, may aid conservation efforts for a few reasons. Firstly, the gut microbiome  
087 is closely related to global environmental change and health (Bahrndorff et al., 2016; Trevelline  
088 et al., 2019; West et al., 2019). Secondly, new microbiology tools are increasingly being integrated  
089 into conservation efforts, such as faecal microbiome transplants (FMTs) (Guo et al., 2020; Born-  
090 busch et al., 2024) and disease-marking bacterial species (Nkera-Gutabara et al., 2022). Studies  
091 have shown that gut microbiome diversity is reduced in species in fragmented and urbanised  
092 environments (Amato et al., 2013; Teyssier et al., 2018). However, physical interventions are  
093 uncommon because they can also result in harmful outcomes, especially when the microbiome  
094 associated with hosts is not understood for most species (Dallas and Warne, 2023). Therefore,  
095 creating microbiome catalogues is the first step to assessing the need for interventions.

096 Current research aims at uncovering the complex interplay between host health and micro-  
097 biome composition, however our level of understanding varies greatly between different host  
098 species (Maritan et al., 2024). For example, the gut microbiomes of carnivores are not as well stud-  
099 ied as those of herbivores and omnivores (Zoelzer et al., 2021). Yet, carnivores play a fundamental  
100 role in maintaining ecosystem function (Hoeks et al., 2020) and apex predators in particular are  
101 keystone species (Sergio et al., 2008), contributing to top-down regulation of trophic-levels (Lwin  
102 et al., 2025). Current research has identified the most abundant bacterial phyla in the gut of  
103 many carnivores as Bacillota, Fusobacteriota and Bacteroidota (de Jonge et al., 2022; Zhu et al.,  
104 2018). These phyla dominate the gut microbiome of carnivores in numerous studies to date,  
105 including spotted seals (*Phoca largha*), spotted hyena (*Crocuta crocuta*), Siberian tigers (*Panthera*  
106 *tigris altaica*), Bengal tigers (*Panthera tigris tigris*), jaguar (*Panthera onca*) and red foxes (*Vulpes*  
107 *vulpes*) (de Jonge et al., 2022; Zhu et al., 2018). Interestingly, strictly meat-eating carnivores show  
108

uniquely high proportions of Fusobacteriota compared to omnivores and herbivores, indicating that this phylum may be important to high protein and fat diets or that these diets may select for Fusobacteriota (Levin et al., 2021; Zhu et al., 2018). At a functional level, carnivores carry a relatively high proportion of genes involved in uric acid degradation in their gut microbiome (Zhu et al., 2018) facilitating the breakdown of the high purine diet of obligate carnivores.

Despite the vital role of the gut microbiome in carnivore health and ecology, there remains a notable scarcity of species-specific data, with most studies aggregating carnivores together (Wu et al., 2022; Youngblut et al., 2020; Zhu et al., 2018). As the apex predator of African savanna, insights into the microbiome of lions may improve assessments of ecosystem health and inform conservation management. There have been few lion gut microbiome studies. Mittal et al. (2020) compared the microbiome of three “African-Asian hybrid” lions (*Panthera leo*) and nine tigers (*Panthera tigris*) in at the Van Vihar National Park, India (Mittal et al., 2020). This park is  $\approx 5\text{km}^2$  in area, and the carnivores have controlled diets. The microbiome of tigers and leopards were consistent with many other carnivores in having the highest abundance of Bacillota (32% and 40%, respectively), but the microbiome of these lions had Fusobacteriota as the most abundant phylum. A study of four Asiatic lions at the Rotterdam zoo<sup>1</sup>, nine leopards (*Panthera pardus*) investigated the impact of changes in diet on the lions (Sun et al.): as expected diet had a significant impact on the microbiota which makes it likely that there will be significant differences with wild lions, which are also much more physically active.

This paper aims to provide a comprehensive analysis of the gut microbiome in free-living, African lions in Etosha National Park, Namibia (22000km<sup>2</sup> in area).

## 2 Results

### 2.1 Sample collection and sequence data

We analysed 23 faecal samples from 20 lions (three lions were sampled twice, about six months apart). Shotgun short-read Illumina sequence data were generated from all samples (150bp reads, average 31.5m reads per sample), and Oxford Nanopore long-read data from 10 samples using version 9 chemistry (average 1.4m reads per sample, average length 2443, N50=4894).

### 2.2 Classification of the lion gut microbiome

Kraken2 (v2.1.6) with Bracken (v3.0.1) was used to classify short-read sequences at the phylum and genus levels of the Genome Taxonomy Database (GTDB) (Fig. 1). The five phyla with the highest abundance, in order of abundance, were: Bacteroidota (42.4%), Bacillota A (17.1%), Actinomycetota (12.9%), Fusobacteriota (12.6%) and Pseudomonadota (8.1%) (Fig. 1A). The most abundant genera were *Bacteroides* (22.1%), *Phocaeicola* (13.3%), *Collinsella* (9.7%) and *Fusobacterium A* (7.4%) (Fig. 1B).

There was variability in the gut bacteria composition among the lions at genus level: eight lions had *Fusobacterium A* (F14 and F15), *Collinsella* (M4, M6 and M8), *Phocaeicola* (F6, M1 and F10) as the most abundant genera rather than *Bacteroides*. Of interest, lion F15 had recently given birth to cubs and lions F14 and M1 were the oldest lions sampled ( $\bar{10}$  years old).

### 2.3 Novel meta-genome assembled genomes from the lion gut microbiome

We constructed two sets of metagenome assembled genomes (MAGs). Using short-read data 272 medium and high-quality MAGs were constructed (Fig. 2A), and using long-read data (polished with short-read data), 46 medium and high-quality prokaryotic MAGs were built (Fig. 2B). They were classified using GTDB-tk (Chaumeil et al., 2022). In addition, 180 high-quality viral MAGs were generated using long-read sequences.

At the phylum level, 94 MAGs from short-reads (35%) were of the phylum Bacillota, 60 Bacteroidota (22%), 46 Fusobacteriota (17%), 38 Actinomycetota (14%), 26 Pseudomonadota

---

<sup>1</sup>We use *Panthera leo persica* and ‘African-Asian hybrid lion’ in this paper as this is how the cited paper describes them; however, this subspecies is no longer considered distinct from *Panthera leo leo* by the IUCN Cat Classification Task Force.

163  
164  
165  
166  
167  
168  
169  
170  
171  
172  
173  
174  
175  
176  
177  
178  
179  
180  
181  
182  
183  
184  
185  
186  
187  
188  
189  
190  
191  
192  
193  
194  
195  
196  
197  
198  
199  
200  
201  
202  
203  
204  
205  
206  
207  
208  
209  
210  
211  
212  
213  
214  
215  
216

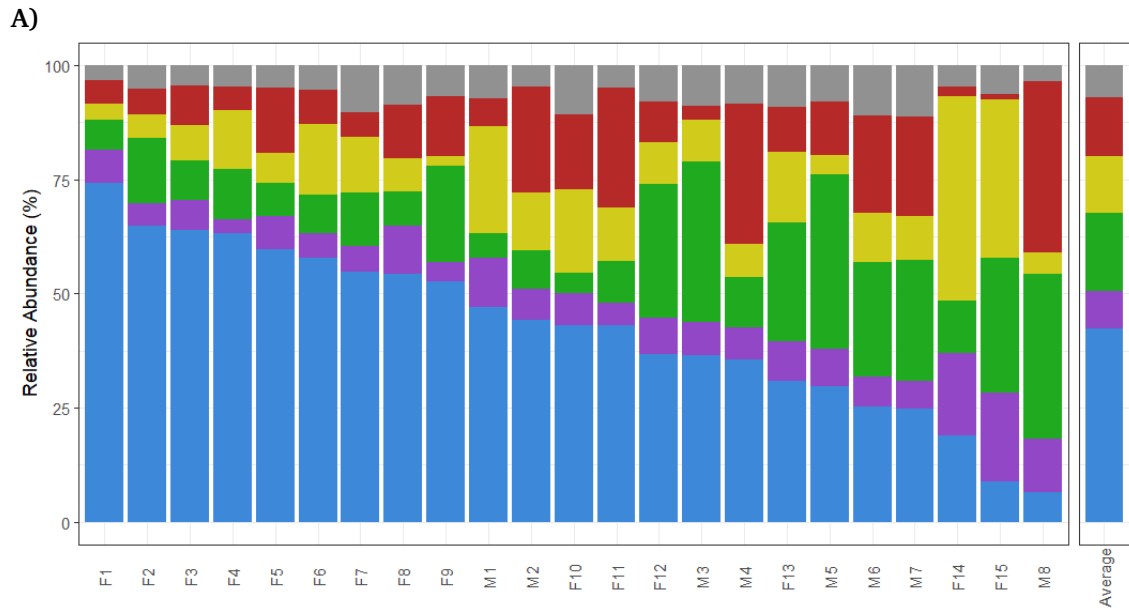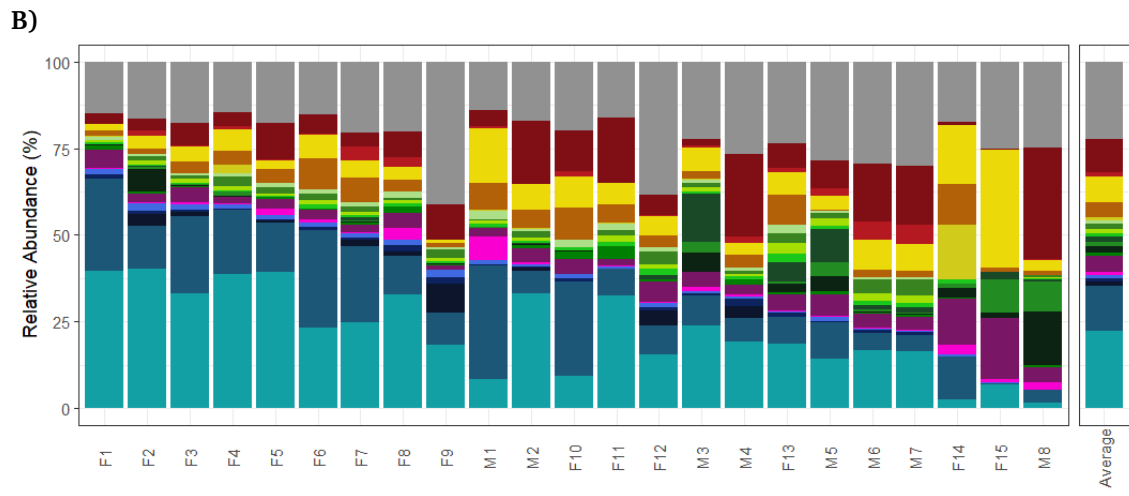

**Fig. 1: The lion gut microbiome is diverse and dominated by Bacteroides genera.** Bar plot showing the relative abundance of (A) the top five bacterial phyla and (B) the top 20 bacterial genera present in the *Panthera leo melanochaita* gut microbiome. Genera are coloured by phylum using the colour scheme shown in panel A. F = Female; M = Male

(10%), six Campylobacterota (2%) and two Desulfobacterota (1%). At the genus level, 29 MAGs from short-reads were classified as *Collinsella* and 29 as *Fusobacterium B*. The list of MAGs from short-read data and associated metadata including GTDB classification can be found as Supplementary Data SD1.

The novelty of the data was revealed when the MAGs from short-read data were compared to 5,596 reference genomes created from the gut microbiome of 180 wild animals (Youngblut et al., 2020). Of the 272 MAGs, 211 (78%) had less than 95% average nucleotide identity (ANI) with any reference MAGs (Fig. 2A).

Of the MAGs from long-read data, 25 were classified as Bacillota (54%), 8 as Bacteriodota (18%), three as Fusobacteriota (7%), five as Actinomycetota (11%), three as Pseudomonadota (7%) and one each as Campylobacterota and Desulfobacteriota. Only 20 could be classified at species level – 24 were classified at genus level and two at family level. The list of MAGs and associated metadata including GTDB classification can be found as Supplementary Data SD2A.

We also constructed 108 high-quality viral MAGs, the vast majority being Caudoviricetes – only four were classified below class level, so the MAGs are likely to be highly novel. The list of viral MAGs with metadata can be found as Supplementary Data SD2B.

## 2.4 Supplementary classification

The high number of unclassified reads (24.5%) shows considerable novelty in the data, and different dominant taxa to previous research. The MAGs we constructed allowed us to improve classification and then studied the functional impact of the microbiota.

We aligned the remaining unclassified short-reads to the 318 MAGs created with long- and short-read data (Fig. 3), reducing the proportion of unclassified reads to 9.2% (an increase of 14.37%). This difference was significant using a paired t-test ( $p = 2 \times 10^{-16}$ ).

## 2.5 Functional classification of the lion gut microbiome

To better understand the functionality of microorganisms in the lion gut, 27,916 short-reads were annotated using GHOSTkoala. We found 44.6% of reads were annotated to KEGG Orthologs (KO) and Pathways (Fig. 4). Of the successfully annotated genes, nearly 80% of those found in the lion gut microbiome were related to metabolism (Fig. 4A). Within the genes associated with metabolism, the most abundant pathway was global and overview maps (2,674 genes). Carbohydrate (676 genes), amino acid (479 genes) and energy (262 genes) metabolism were the second, third and fourth most abundant pathways, respectively. Outside of metabolism, environmental information processing (555 genes), genetic information processing (252 genes), and cellular processes (266 genes) had the highest abundances of associated genes.

Contigs created from short-reads were also compared against the KEGG database and analysed for pathways with highest average completeness across samples (Fig. 4B). The tricarboxylic acid (TCA, Krebs) cycle showed the highest mean completeness (0.97), followed closely by the Complex V: V/A-type ATPase (prokaryotes) (0.97) and glycolysis (Embden–Meyerhof pathway) (0.95). Other major energy-generating pathways were also near complete, including the Complex V: F-type ATPase (prokaryotes/chloroplasts) (0.88), pentose phosphate pathway (0.86), and Complex I: NADH:quinone oxidoreductase (prokaryotes) (0.85). Several carbon fixation and anaerobic energy metabolism pathways also displayed high completeness, such as the reductive pentose phosphate (Calvin) cycle (0.85), reductive acetyl-CoA (Wood–Ljungdahl) pathway (0.83), and the reductive citrate (Arnon–Buchanan) cycle (0.81). The Complex II: succinate dehydrogenase (prokaryotes) was also substantially represented (0.75).

Considering the high purine diet of lions, nucleotide metabolism (150 identified genes) was investigated more specifically. Under nucleotide metabolism, purine metabolism was analysed through guanine, adenine and urate degradation pathways (Fig. 4C). Metabolism of guanine monophosphate (GMP) and adenine monophosphate (AMP) could be entirely performed by the lion gut microbiome except for the conversion of urate to 5-hydroxyisourate. In this case, no

271  
 272  
 273  
 274  
 275  
 276  
 277  
 278  
 279  
 280  
 281  
 282  
 283  
 284  
 285  
 286  
 287  
 288  
 289  
 290  
 291  
 292  
 293  
 294  
 295  
 296  
 297  
 298  
 299  
 300  
 301  
 302  
 303  
 304  
 305  
 306  
 307  
 308  
 309  
 310  
 311  
 312  
 313  
 314  
 315  
 316  
 317  
 318  
 319  
 320  
 321  
 322  
 323  
 324

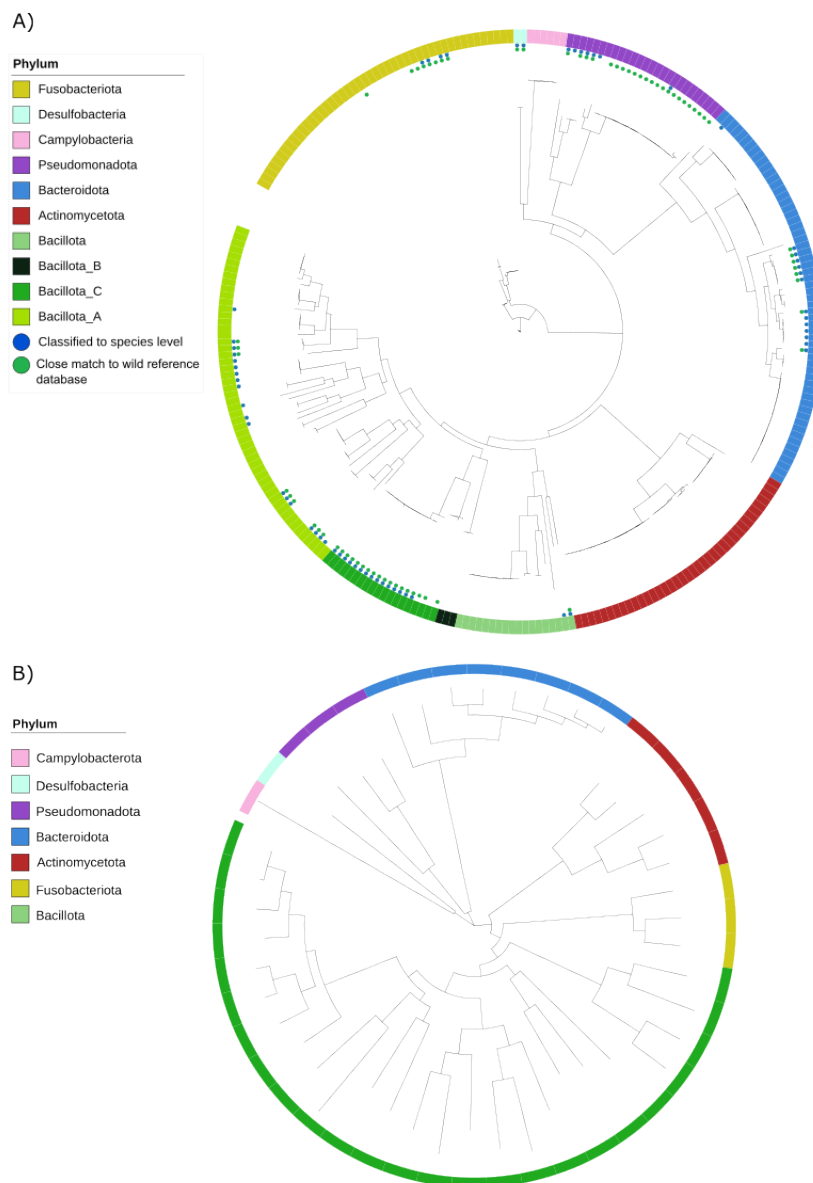

**Fig. 2: The majority of MAGs created from the lion gut represent novel species** Phylogenetic trees showing the diversity of MAGs created using **A)** 272 short-reads and **B)** 46 long-reads of medium to high quality sequenced from the lion gut microbiome. MAGs from short-reads were compared to 5 596 MAGs from a wild animal reference database.

proteins were annotated as either urate oxidase or flavin adenine dinucleotide (FAD)-dependant urate hydroxylase, suggesting that these enzymes are absent in the gut bacteria of lions.

## 2.6 Sex and season as causes of variability in the gut microbiome of lions

Using data from the Bracken genus level, the Bray-Curtis dissimilarity index was measured to identify whether the overall gut microbiome diversity of lions differed between males and females. After multiple hypothesis correction, there were no significant differences in the composition of the gut microbiome between male and female lions ( $P = 0.096$ ; d.f. = 22)(Fig. 5A). Due to the large proportion of unclassified reads, a reference agnostic approach was used to confirm the findings. Sourmash was used to divide reads into k-mers and calculate Bray-Curtis distances between

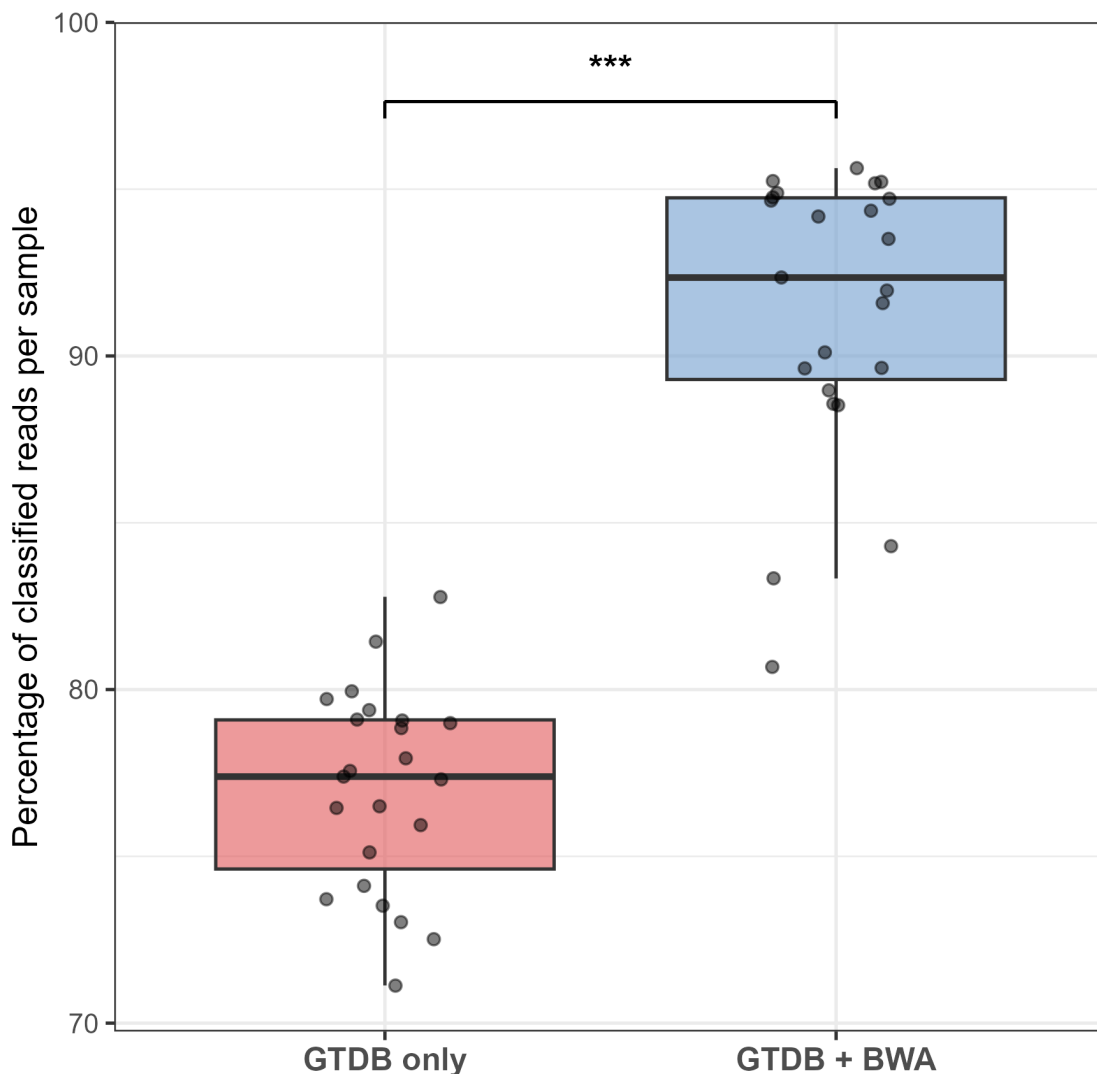

**Fig. 3: Inclusion of MAGs reduces the proportion of unclassified reads, while increasing assignment to known genera.** Box plot showing the percentage of total reads classified at the genus level using Kraken2 with the Genome Taxonomy Database (GTDB) alone compared to GTDB supplemented with novel lion gut MAGs (via BWA mapping).  
 \*\*\* =  $p < 0.005$

samples. The results confirmed that there were no significant differences in the composition of the gut microbiome between the sexes ( $P = 0.255$ ; d.f. = 22)(Fig. 5B). However, at a more specific level, one species, *UMGS1663 sp012513065* was significantly more abundant in male lions ( $P = 0.0007$ ) compared to female lions.

The Shannon diversity of the samples ranged from 1.74 to 2.4. There was no significant difference in Shannon diversity between the two sexes ( $P = 0.68$ ; d.f. = 22) (Fig. 5E).

Similar analyses were performed to identify differences between lions caught in winter and summer. There was no significant difference in the lion gut microbiome between lions captured in either season ( $P = 0.44$ ; d.f. = 22) (Fig.5C) using Bray Curtis dissimilarity. Once again, a reference agnostic approach confirmed this finding ( $P = 0.255$ ; d.f. = 22) (Fig.5D). There was also no significant difference in Shannon diversity between lions captured in either season ( $P =$

379  
380  
381  
382  
383  
384  
385  
386  
387  
388  
389  
390  
391  
392  
393  
394  
395  
396  
397  
398  
399  
400  
401  
402  
403  
404  
405  
406  
407  
408  
409  
410  
411  
412  
413  
414  
415  
416  
417  
418  
419  
420  
421  
422  
423  
424  
425  
426  
427  
428  
429  
430  
431  
432

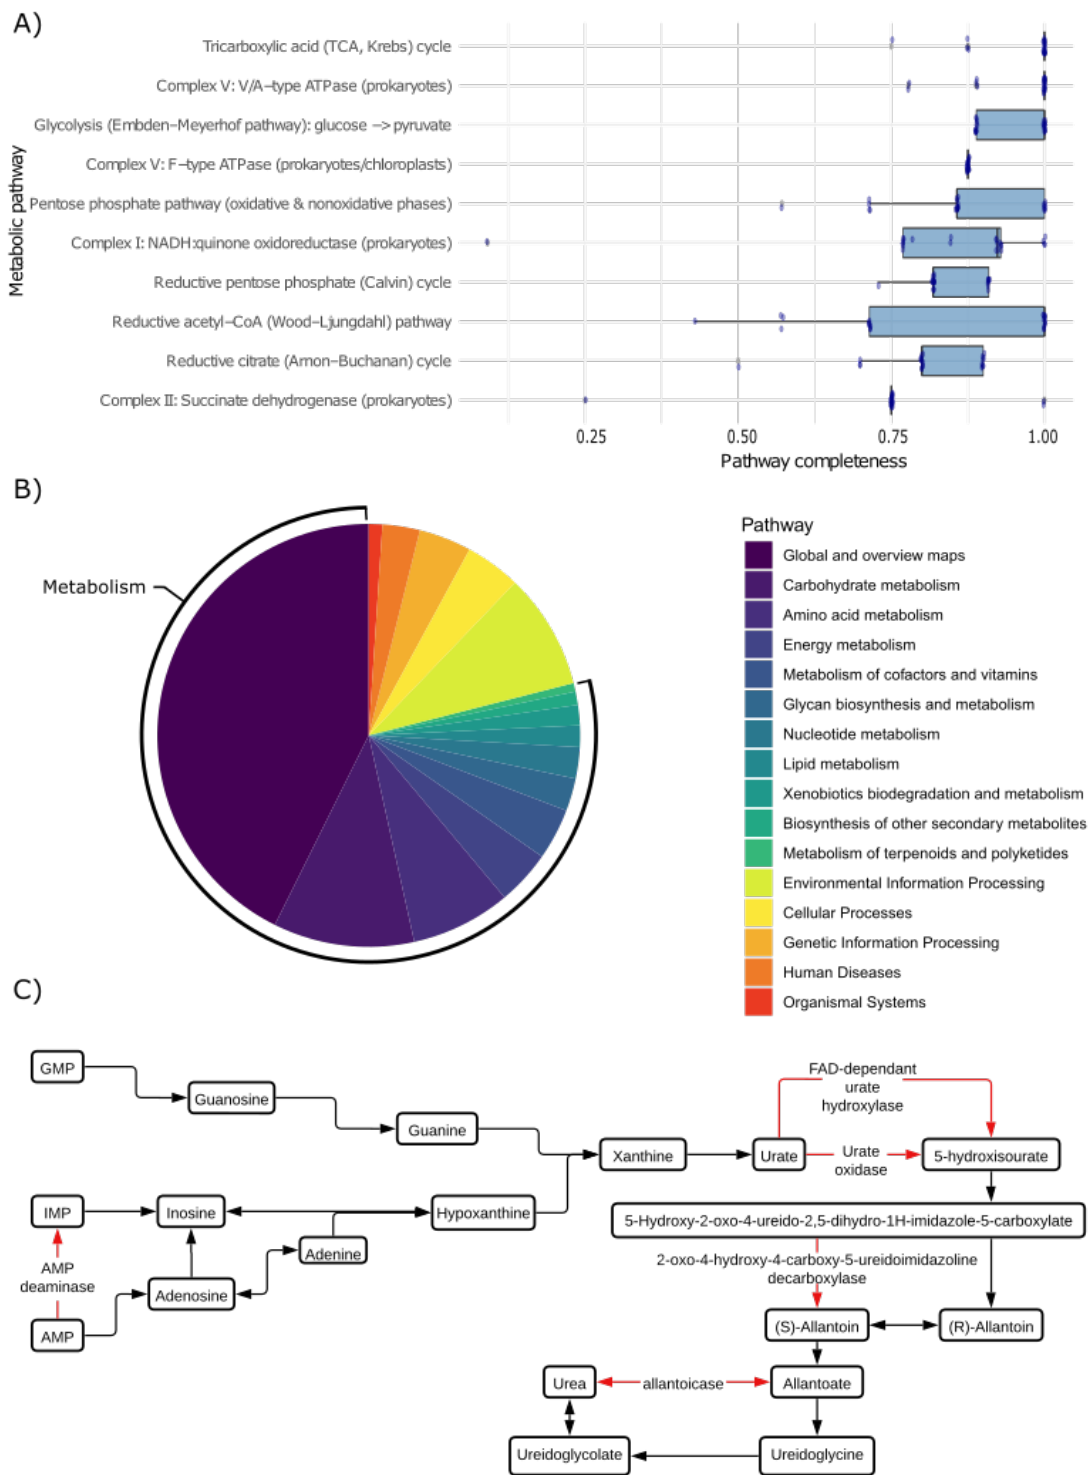

**Fig. 4: The lion gut microbiome has a large proportion of genes involved in amino acid and purine metabolism.** A) Box plot showing the top 10 functional pathways with the average completeness across all lion gut microbiome samples. B) Pie chart showing the distribution of KEGG pathways detected across all samples. A pathway is counted as present if at least one protein hit to that KEGG pathway was identified in any sample. C) Overview of purine metabolism and urate degradation pathway. Red arrows indicate a gene not found in the 23 lion gut microbiomes.

0.18; d.f. = 22) (Fig.5F). No bacterial species were significantly more or less abundant in lions captured in winter compared to those captured in summer.

## 3 Discussion

### 3.1 Classification of the lion gut microbiome

#### 3.1.1 Core taxa

On average, *Bacteroides* was the most abundant genus in the gut microbiome of free-living lions in Etosha National Park (22.1%). The majority of *Bacteroides* reads were classified as *Bacteroides* sp. 900766005 (13.6%). There are three genomes for this species on the GTDB database, one created from metadata sampled from domestic cats (*Felis catus*), (PLAZA ONATE, 2023), the other two derived from human gut samples collected in China (Nayfach et al., 2019). *Bacteroides* is often the most abundant genus in the mammalian gastrointestinal tract and, in some studies, is the only genus common between herbivores, carnivores and omnivores (Wu et al., 2022). *Bacteroides* species are Gram-negative, obligate anaerobic, non endospore-forming bacilli that can be motile or non-motile (Karlsson et al., 2011). *Bacteroides* species are involved in various metabolic activities, including the degradation of complex carbohydrates and the production of short-chain fatty acids (SCFA) (Houtman et al., 2022). Indeed, humans with a high intake of protein and animal fat in their diet have a high abundance of *Bacteroides* (Wu et al., 2011). Similarly, a number of carnivores with high protein and fat diets have high abundances of *Bacteroides* (percentage abundances are mentioned in brackets), including black-backed jackals (*Canis mesomelas*) (15.1% (Menke et al., 2014) and 15.76% (Wu et al., 2022)), wild wolves (*Canis lupus*) (16%) (Zhang and Chen, 2010), dholes (*Cuon alpinus*) (13.58%) (Wu et al., 2022) and raccoon dogs (*Nyctereutes procyonoides*) (36.91%) (Wu et al., 2022).

However, *Bacteroides* is not the most abundant genus in the gut of all carnivores. In the gut of spotted hyena (*Crocuta crocuta*) in Masai Mara National Reserve in Kenya, *Clostridium* (17.88%) was the most abundant genera and *Bacteroides* (3.38%) far less so (Rojas et al., 2022). Diet quality appears to be a major driver of these patterns; Rojas et al. (2022) demonstrated that *Bacteroides* abundance in hyenas increased fivefold during a severe two-year drought, when prey availability declined and hyenas were forced to scavenge more frequently and likely consumed a broader range of tissues. In contrast, during periods of high prey availability, *Clostridium* remained dominant (Rojas et al., 2022). Similarly, the gut of wild cheetah (*Acinonyx jubatus*) in central Namibia, is dominated by *Clostridium* (24.5% (Menke et al., 2014) and 19.5% (Wasimuddin et al., 2017)) while *Bacteroides* is comparatively low (5.4%). In the same paper, Wasimuddin et al. (2017) positively correlate the abundance of *Clostridium* species in the cheetah gut with captivity, suggesting the difference in diet as a possible cause of this difference, again supporting the idea of a diet as a core driver of microbiome diversity.

A notable distinction between lions and cheetahs is their social vs solitary natures; lions exhibit a cooperative, pride-based hunting strategy, whereas cheetahs typically hunt and consume prey individually (Hilborn et al., 2018). Other carnivores such as jackals, wolves, and dholes, which share a similar abundance of *Bacteroides* to lions, also engage in pack hunting (Barber-Meyer et al., 2016; Hayward and Kerley, 2008). This difference in social organisation could have a variety of effects on the gut microbiome. Firstly, pack-hunting animals are more likely to horizontally transfer bacterial species between individuals, especially in animals with a fluctuating pride structure, like lions (Sarkar et al., 2020). In contrast, solitary hunters have limited interactions with conspecifics, resulting in lower rates of bacterial exchange (Logan et al., 2010). Secondly, pack hunting and solitary hunting affect dietary patterns: solitary hunters consume the most nutritious portions of prey immediately, while pack hunters usually distribute resources based on social hierarchies (Hayward and Kerley, 2008). Finally, these different hunting tactics have different dietary requirements, for instance, cheetahs' reliance on short bursts of energy necessitates a high protein intake, whereas lions prioritise a diet rich in both protein and fat (Hayward and Kerley, 2008).

487  
 488  
 489  
 490  
 491  
 492  
 493  
 494  
 495  
 496  
 497  
 498  
 499  
 500  
 501  
 502  
 503  
 504  
 505  
 506  
 507  
 508  
 509  
 510  
 511  
 512  
 513  
 514  
 515  
 516  
 517  
 518  
 519  
 520  
 521  
 522  
 523  
 524  
 525  
 526  
 527  
 528  
 529  
 530  
 531  
 532  
 533  
 534  
 535  
 536  
 537  
 538  
 539  
 540

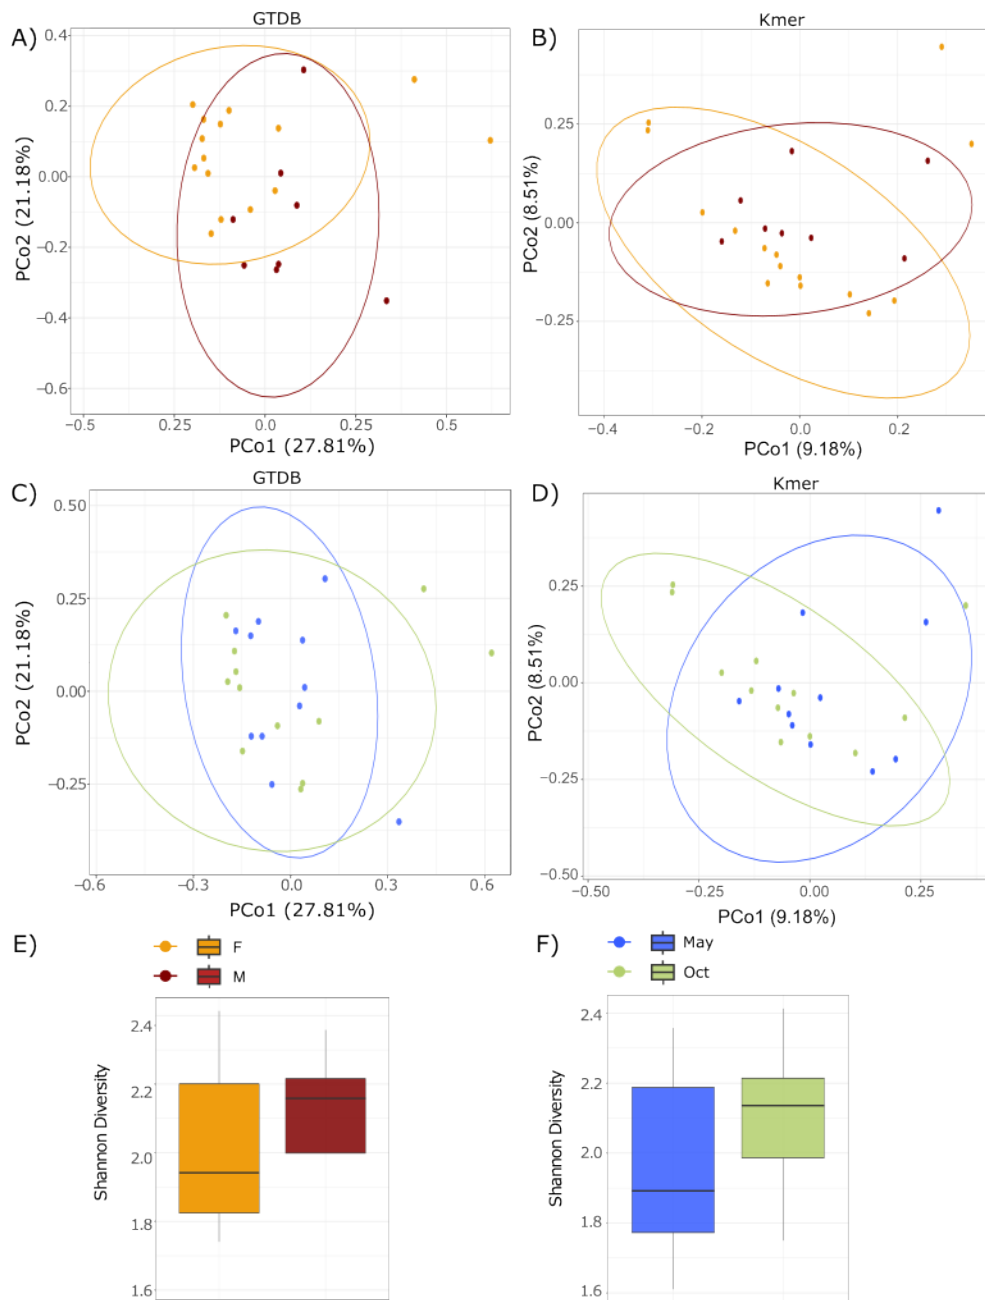

**Fig. 5: Sex and season explain little variance in the lion gut microbiome.** Principal coordinates analysis (PCoA) plots the gut microbiome of male and female lions using **A)** weighted UniFrac distances of gut bacteria and **B)** k-mer distances. PCoA plots of gut microbiome of lions in May (winter) and October (summer) using **C)** weighted UniFrac distances of gut bacteria and **D)** k-mer distances. There was no significant difference between seasons or sexes. Shannon diversity of the gut microbiome of **E)** male and female lions and **F)** lions in May and October using species counts.

These differences affect the gut microbiome and together may be the reason for a higher abundance of *Bacteroides* in the gut of pack-hunters compared to solitary hunters. However, solitary hunting cannot be the only explanation for reduced abundance of *Bacteroides* in the carnivore gut as hyena also have low *Bacteroides* abundance, despite their large fission-fusion clans (Smith et al., 2007; Rojas et al., 2022). Taken together, current evidence suggests that dietary quality, prey composition, and tissue selection are likely the primary drivers of dominant bacterial genera in carnivore gut communities, with social structure also influencing microbiome diversity.

Differences between African and the captive, hybrid lions further illustrate the impact of ecological and environmental factors on gut microbial composition. The captive, hybrid and Asiatic lions exhibit *Fusobacterium* (35% and 14% respectively) as the most abundant genus in their gut (Mittal et al., 2020; Sun et al., 2025), although in the Asiatic lions, this abundance was diet dependant. Regardless, the high abundance of *Fusobacterium* is in contrast to our findings regarding the African lion (*Fusobacterium* was 7.4% abundant). To check whether taxonomic differences at genus/species levels could be due to updates in taxonomy and new classification approaches (Parks et al., 2018), we reclassified the sequences collected from the three lions in Mittal et al. (2020) using our own custom pipeline (the other lion studies discussed generated 16S rRNA gene data and so are not directly comparable). Although, we saw changes in the relative abundance of many genera compared to the original paper (Supplementary figure S1), there remained very large differences in bacterial genus and phyla abundance between the African and Asian subspecies. When reclassified through our own pipeline, the most abundant phylum in these captive hybrid lions was Firmicutes (Bacillota). The high abundance of Firmicutes aligns with more recent studies on the same subspecies also in captivity (Sun et al., 2025).

There are multiple possible reasons for the difference in bacterial gut genera between hybrid lions, Asiatic lions (*Panthera leo persica*) and African lions (*Panthera leo melanochaita*). Firstly, the gut microbiome is known to differ between hosts of different geographies, for example humans (Goertz et al., 2019) and some carnivores (Adams et al., 2021; Colborn et al., 2020). Secondly, the lions in our study were born in the wild and have been free roaming their entire lives, while the hybrid and Asiatic lions were captive and on controlled diets (Mittal et al., 2020). As discussed above, captivity and its related diet is a probably cause for at least some differences in the gut microbiome of these host subspecies. Finally, it is possible that changes in bacterial genera in the gut are caused by their allopatric separation over a prolonged period of evolutionary history (de Manuel et al., 2020). The two subspecies share a similar proportion of high-level taxa such as phylum but differ at lower levels such as genus caused by minor phylogeographic changes over time, supporting the idea of evolutionary divergence. Allopatric separation is a plausible explanation for the differences in abundance between the lions native to Namibia and India as they still retain some similar abundances of bacteria common to both subspecies. For example, both groups have a high abundance of *Phocaeicola*, which may be a conserved genus within the gut microbiome of lions for functional reasons, thus it is retained in similar abundance regardless of geography. On the other hand, genera such as *Bacteroides*, *Sutterella* and *Fusobacterium* were able to shift over time either because they perform similar functions within the lion gut or because they do not serve an essential function within the lion gut. Indeed, temporal changes in the gut microbiome of carnivores are well-documented (Schlomann and Parthasarathy, 2019), specific studies indicating substantial fluctuations in *Bacteroides* abundance over years (Rojas et al., 2022).

### 3.2 Novel meta-genome assembled genomes from the lion gut microbiome

The 318 newly generated bacterial MAGs newly generated from short-read and long-read data and 102 new viral MAGs contribute to current wild animal databases and expand gut metagenome comparisons given the absence of prior sampling or sequencing of the African lion gut microbiome. Metagenomic analyses are negatively affected by incomplete databases (de la Cuesta-Zuluaga et al., 2020), which can lead to incorrect conclusions drawn about the wild animal gut microbiome and can affect diversity metrics, beta diversity comparisons and abundance charts. The MAGs generated in this study provide a significant contribution to current databases. Given that the majority of MAGs could not be classified to the species level and differ in average nucleotide

595 identity (ANI) from current databases, they likely represent a variety of new species which could  
596 enrich current databases and aid in understanding the functions of the lion gut microbiome in the  
597 future.

598 In view of the fact that none of the MAGs in the Actinomycetota phylum were classified to  
599 the species level, it is likely that there are species in this phylum unique to the lion gut ([Richter  
600 and Rosselló-Móra, 2009](#)). Interestingly, the phylogenetic distances between MAGs in this phylum  
601 were noticeably lower than other phyla, which could signify genomes from one or two novel  
602 species unique to the lion gut. A similar pattern of several closely related MAGs not classified to  
603 the species level was identified in a few phyla, including, Bacillota C, Bacteroidota, Bacillota B  
604 and Pseudomonadota. While all 272 MAGs from short-reads and 46 MAGs from long-reads are  
605 unlikely to represent new species, we envisage MAGs from multiple new species identified from  
606 this research. At the genus level, a large proportion of MAGs were classified as *Collinsella* and  
607 *Fusobacterium B*, implying a similar addition to these genera in current databases.

608

### 609 **3.3 Functional classification of the lion gut microbiome**

610

611 Functional analysis showed metabolism as the most abundant pathway represented in the lion  
612 gut microbiome, with carbohydrate and amino acid metabolism in highest abundance besides the  
613 generalised global and overview maps. Bacteria in the carnivore gut have a similar proportion of  
614 amino acid metabolism and carbohydrate metabolism genes ([Zhu et al., 2018](#)). This discovery of  
615 high carbohydrate metabolism is not necessarily surprising as carbohydrates are common in the  
616 lion's diet ([Borstlap, 2002](#)). Carbohydrates can be ingested from prey tissues and plant matter  
617 consumed incidentally during feeding. The abundance of carbohydrate-metabolising genes sug-  
618 gests that bacteria in the lion gut have the metabolic potential to process incidental carbohydrate  
619 intake (e.g. fresh grass incidentally consumed, or ungulate stomach contents).

620 Aerobic-respiratory signatures are very well represented in the lion gut: the tricarboxylic acid  
621 (TCA) (Krebs) cycle along with components of the electron transport chain (Complex I, Complex  
622 II) and ATP synthase (Complex V) pathways scored among pathways the highest average com-  
623 pletion of genes. The presence of both F-type and V/A-type ATPases is particularly notable: while  
624 F-type ATPases typically drive ATP synthesis via the proton-motive force, V/A-type ATPases are  
625 reversible machines, and in gut bacteria may function using ATP hydrolysis to pump protons out of  
626 the cell in order to maintain cytoplasmic pH under acid, anaerobic or stress conditions ([Zubareva  
627 et al., 2020](#)). The ability to maintain a consistent pH is essential for bacteria in the physiologically  
628 stressful environment of the carnivore gastrointestinal tract ([Barathan et al., 2024](#)). In parallel,  
629 the glycolysis (Embden–Meyerhof) pathway and the pentose phosphate pathway also show high  
630 completeness. Both pathways are core aerobic and anaerobic routes of carbohydrate catabolism  
631 ([Gupta and Gupta, 2021](#)). Their high completeness aligns with the overall enrichment of genes  
632 related to metabolism and respiration observed across the lion gut MAGs.

633 Strongly anaerobic and autotrophic pathways are also well represented: the reductive acetyl-  
634 CoA (Wood–Ljungdahl) pathway and the reductive TCA (Arnon–Buchanan) cycle indicate a  
635 capacity for acetogenesis, CO<sub>2</sub> fixation, or hydrogen-coupled metabolism typical of strictly anaer-  
636 obic bacteria ([Ragsdale and Pierce, 2008](#)). Finally, the Calvin (reductive pentose-phosphate) cycle  
637 was highly complete in most samples which is interesting as this cycle is present in less than 7%  
638 of microbial genomes ([Asplund-Samuelsson and Hudson, 2021](#)). Although traditionally associ-  
639 ated with photosynthetic carbon fixation, in gut bacteria the pathway (or RuBisCO-like enzyme  
640 variants) may participate in CO<sub>2</sub> refixation, redox balancing, or nucleotide salvage rather than  
641 canonical photosynthesis ([Asplund-Samuelsson and Hudson, 2021](#)).

642 Taken together, these data emphasize that the lion gut microbiome is not simply composed of  
643 obligate anaerobic meat-degraders but harbours a functionally versatile community, one able to  
644 operate robust aerobic respiration, facultative fermentation, anaerobic autotrophy/acetogenesis,  
645 ion-gradient maintenance and redox recycling. Such metabolic flexibility likely reflects adaptation  
646 to the protein-rich, and intermittently oxygenated gut environment of a carnivore.

647

648

Furthermore, bacteria in the lion's gut had all the genes necessary to metabolize purines to urea independently of the host, except for one step, namely, the conversion of urate to 5-hydroxyisourate; none of the reads corresponded to the urate oxidase gene or FAD-dependent urate hydrolase. We focused on this pathway because of lions' high purine diet (Herring et al., 2021). Purine metabolism is essential for many carnivores, including lions, to effectively utilise dietary resources and maintain metabolic homeostasis (Zhu et al., 2018). Purines are essential components of nucleic acids and play vital roles in cellular processes, making their metabolism crucial for cellular function and energy metabolism. The presence of 18 proteins involved in purine metabolism indicates that microorganisms in the lion gut are actively assisting lions to digest important components of their diet.

### 3.4 Sex and season as causes of variability in the gut microbiome of lions

We found no significant differences in overall classification, read composition or alpha diversity in the gut microbiome between sexes or seasons. Initially, a difference in the composition of the intestinal microbiome between sexes would be expected, as this difference has been discovered in a few wild species, including minks (*Neovision vision*) (Lafferty et al., 2022), western lowland gorillas (*Gorilla gorilla gorilla*) (Pafčo et al., 2019), dholes (*Cuon alpinus*) (Wu et al., 2016). In the cases where sex drives a difference in gut microbiome composition, differences are often hypothesised to arise from behavioural or ecological distinctions between males and females, particularly consistent differences in diet, such is the case with foragine gorillas (Pafčo et al., 2019). However, other studies have not identified a difference between sexes in gut microbiome composition and alpha diversity in animals such as cheetahs (*Acinonyx jubatus*) (Wasimuddin et al., 2017), Egyptian mongooses (*Herpestes ichneumon*) and chimpanzees (*Pan troglodytes schweinfurthii*) (Degnan et al., 2012). While male and female lions can differ in diet due to their hierarchical feeding habits, pride compositions of lions are more complex than simple hierarchy; all-female prides are common, prides are often split into smaller groups, cooperative hunting is not always preferred (many solitary hunters exist) and sometimes pride hierarchies are not apparent (Rubenstein and Wrangham, 2014). The flexible nature of lion prides is likely to cause fluctuating dietary overlap and frequent interactions between individuals, promoting horizontal transfer of gut microorganisms. Variable social structures could therefore homogenize gut microbial communities between males and females, reducing or eliminating sex-linked microbiome differences.

Based on simulated PERMANOVA analyses, approximately 10 subjects per group – similar to our sample size — have about 90% power to detect a relatively strong community-level effect ( $\omega^2 \approx 0.02$ ) (Kelly et al., 2015). Smaller differences (below this threshold) would likely go undetected at our current sample size. Thus, while our dataset is adequately powered to identify major sex- and season-related shifts in community composition, it may lack sensitivity to more subtle or taxon-specific effects.

## 4 Conclusion

This study represents the first comprehensive taxonomix analysis of the microbiome classification of African lions (*Panthera leo melanochaita*) and reconstructing the largest collection of metagenome-assembled genomes (MAGs) from lion faecal samples and substantially expanding reference genome representation for this host in public databases. The most abundant bacterial genera present in the 23 African lion gut microbiome samples were *Bacteroides* and *Phocaeicola*, two genetically related genera from the same family. The high abundance of *Bacteroides* in the lion gut was in contrast to the only previous study investigating lions specifically, which found *Fusobacterium* to be the most abundant genera in the gut microbiome of three captive, hybrid lion (Mittal et al., 2020). The differences may be due to captivity experiences of the hybrid lions or allopatric separation between the two subspecies preventing transfer of microbial species and allowing for changes in the gut microbiome composition over time. Furthermore, we believe that since the genus *Phocaeicola* was similarly abundant in both subspecies, it serves a conserved function in the lion gut microbiome.

703  
704  
705  
706  
707  
708  
709  
710  
711  
712  
713  
714  
715  
716  
717  
718  
719  
720  
721  
722  
723  
724  
725  
726  
727  
728  
729  
730  
731  
732  
733  
734  
735  
736  
737  
738  
739  
740  
741  
742  
743  
744  
745  
746  
747  
748  
749  
750  
751  
752  
753  
754  
755  
756

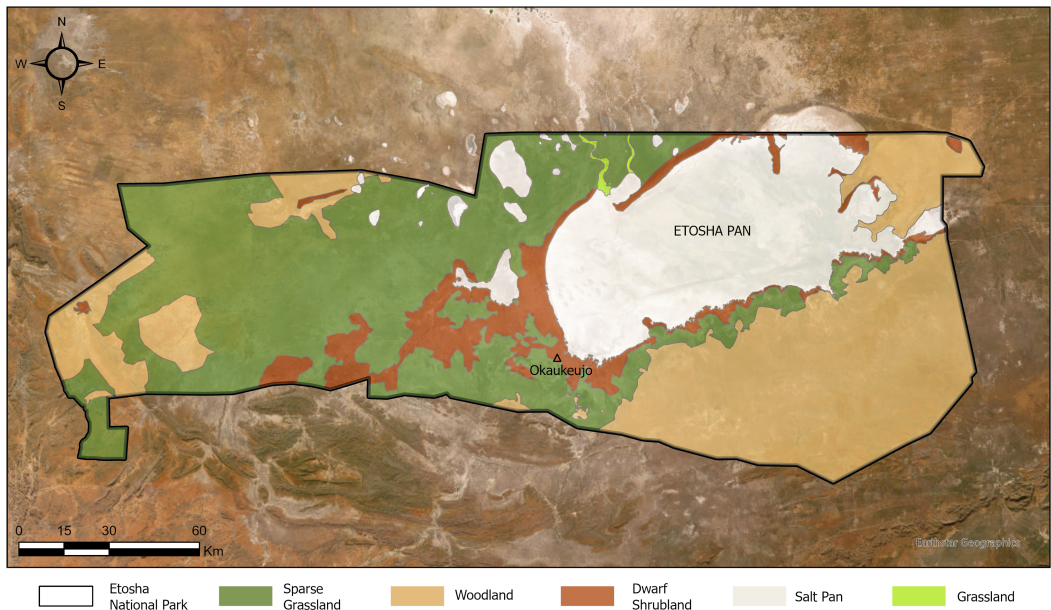

**Fig. 6:** Etosha National Park vegetation structure. The black line represents the borders of the park. The triangle marks Okaukuejo camp.

This study identified 272 MAGs from short-reads and 46 MAGs from long-reads which will contribute significantly to current databases. Supplementing current databases with these MAGs decreased the percentage of total unclassified reads from 24.51% to 9.24% indicating a noticeable contribution to classification efforts. Given that the majority of MAGs could not be classified to the species level and differed in average nucleotide identity by more than 95% from current databases, they represent new species not present in current databases. Further analysis of these MAGs will help to identify specifics about these new species and support the development of current databases.

Finally, functional classification revealed the lion gut microbiome to have a high abundance of metabolic genes. Specifically, purine metabolism was well-represented, indicating commensal microorganisms assisting the lions to digest important components of their diet. We found the gut microbiome did not differ significantly between male and female lions nor did it differ between lions caught in winter or summer.

## 5 Methods

### 5.1 Study area

Faecal samples were collected from free-living lions in Etosha National Park (Fig. 6). The park is a 22 270 km<sup>2</sup> fenced reserve in northern Namibia. Etosha is subdivided into three major habitats; woodlands on the far west and east of the park, open grassland plains in the centre and a hypersaline pan in the central region (Heydinger and Packer, 2022). The park experiences approximately 350-460mm of rainfall per year (Turner et al., 2022), with December to March being the hottest and wettest months (Turner et al., 2022). In winter, temperatures range from 18-28°C during the day, while below zero temperatures are common at night. In the summer, temperatures range from 20-34°C during the day (Turner et al., 2022). The sampled lions primarily occupied the plains area surrounding Okaukuejo (19.175°S, 15.924°E).

## 5.2 Sampling

This microbiome project was part of a larger carnivore project in a collaboration between the University of the Witwatersrand, the Leibniz Institute for Zoo and Wildlife Research and the Etosha Ecological Institute. The study lions were sedated for a maximum of 10 minutes to fit or remove tracking collars and collect health status information, and fresh faecal samples. A total of 23 faecal samples were collected in OMNIgen GUT tubes (DNAGenotek, Kanata, Canada) from 20 lions, across 12 prides (Supplementary table S1). Immobilisation of the lions took place in two seasons, namely winter (May 2022) and summer (October 2022). Samples were placed in a cooler box at 15°C within 5 minutes of collection and then moved to a –20°C freezer within 24 hours for longer term storage.

## 5.3 DNA extraction and sequencing

After the final samples were collected in October 2022, genomic DNA was extracted from 250 milligrams of each faecal sample using the DNeasy PowerSoil extraction kit (QIAGEN, Hilden, Germany) following the manufacturer’s instructions. DNA was then shipped to South Africa.

Illumina short-read shotgun sequencing was done at National Institute for Communicable Diseases in Johannesburg, South Africa: DNA preparation was performed using the Illumina DNA prep kit and PCR was performed using the Illumina DNA prep reference guide (Illumina, 2024). The samples were sequenced on the Illumina Nextseq 2000 platform. Reads were provided in FASTQ format (average of 30.4m reads per sample).

For long-read sequencing, 10 high quality samples were sent to the Genomics Platform of the South African Medical Research Council (SAMRC) for Oxford Nanopore Technology (ONT) sequencing. Long-read sequencing was performed on an Oxford Nanopore GridION platform with MinION R9.4.1 flow cells and SQK-LSK109 library preparation chemistry, yielding an average of 1.4 million reads per sample (N50 = 4,894). ONT data was provided in FAST5 format, which were converted into Pod5 format using the POD5 Python Package (Oxford Nanopore, 2024). Base calling was done using Dorado v.0.8.0 (Nanopore, 2024).

## 5.4 Bioinformatics analysis

### 5.4.1 Short-read sequencing

The [github.com/bhattlab/AWIGen2Microbome](https://github.com/bhattlab/AWIGen2Microbome) pipeline was used as a basis for processing the short-read metagenomic sequencing. The repurposed pipeline is shown in Fig. 7.

Short-reads reads were preprocessed by removing duplicate and low-quality reads. Trimgalore v0.6.7 (Krueger, 2015) parameters were set to a read quality (Phred score) greater than 30 and a minimum read length of 60 base pairs. Lion sequences were also removed from the samples by aligning them to a lion reference genome from Ensembl using Burrows-Wheeler Aligner Maximal Exact Matches (BWA-MEM) v0.7.17 (Li and Li, 2020). The quality of reads was then assessed using FastQC v0.11.9 and MultiQC v1.13 (Ewels et al., 2016). After quality filtering and removal of orphan reads, samples contained an average of 4.9 million reads per sample.

Preprocessed short-reads were classified using Kraken2 (Wood et al., 2019) with a *k*-mer length of 31 and read length of 130 against the Genome Taxonomy Database (GTDB version 226) and the April 2025 version of Kraken viral database, using the pre-computed index from <https://benlangmead.github.io/aws-indexes/k2> followed by Bracken (Lu et al., 2017) for an estimation of relative abundance. Statistical analyses were performed using R v4.1.2. Taxonomic alpha and beta diversity were calculated with vegan v2.6-4. Linear regression for differential abundance of taxa, principal coordinate analyses were carried out using the R base package. PERMANOVA was used to test for significant differences in MDS and t-tests for differences in alpha diversity (Li et al., 2022). Phylogenetic trees were visualised with iTOL v655 (Letunic and Bork, 2007). Beta diversity was quantified and visualised using Bray-Curtis dissimilarity index. Bray-Curtis dissimilarity was first quantified using Bracken classification, however, due to the large abundance of unclassified reads, a reference agnostic approach was performed using Sourmash v

811  
812  
813  
814  
815  
816  
817  
818  
819  
820  
821  
822  
823  
824  
825  
826  
827  
828  
829  
830  
831  
832  
833  
834  
835  
836  
837  
838  
839  
840  
841  
842  
843  
844  
845  
846  
847  
848  
849  
850  
851  
852  
853  
854  
855  
856  
857  
858  
859  
860  
861  
862  
863  
864

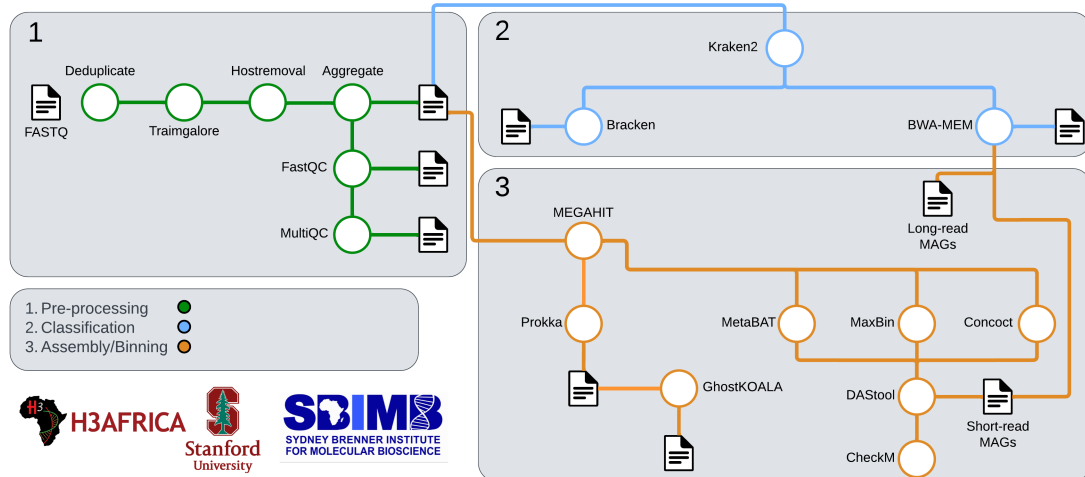

**Fig. 7:** Nextflow pipeline used to process DNA reads created from the gut microbiome of lions in Etosha National Park, Namibia. Box 1 shows the steps for pre-processing the samples for removal of low quality reads and quality report generation. Box 2 shows the steps used for taxonomically classifying the reads. Box 3 shows the steps for assembling and binning the reads into contigs and Metagenome Assembled Genomes (MAGs).

(Moore et al., 2022) to confirm the results for beta diversity measurements. A linear regression model was used to determine the relationship between bacterial genera and the sex of the lion or season the sample was collected.

Pre-processed short-reads were assembled into MAGs. Contigs with a completeness of 50% and above and contamination below 10% were retained for further analysis. Contigs were then binned into groups based on similarity using MetaBAT2 v2.15 (Kang et al., 2019), MaxBin v2.2.7 (Wu et al., 2016) and Concoct v1.1.0 (Alneberg et al., 2013) and then combined using DAStool v1.1.6 (Sieber et al., 2018). The following parameters were used:

- MaxBin – contig length  $\geq 1\ 000$ , marker gene sets=107, probability threshold=0.9;
- MetaBAT – contig length  $\geq 2\ 500$ ,  $\geq 95\%$  contig quality for each bin, bin size  $\geq 200\ 000$ ; and
- Concoct – k-mer length 4, contig length  $\geq 1\ 000$ .

MAGs were taxonomically classified using GTDK-tk v2.4.1 (Chaumeil et al., 2022). Lastly, MAG functional analysis was performed using Prodigal v2.6.3 (Hyatt et al., 2010), GhostKOALA (Kanehisa et al., 2016) and DRAM (Shaffer et al., 2020) v2.0.0-beta11.

### 5.4.2 Long-read analysis

MAGs created from long-reads were assembled using OPERA-MS v0.9 in hybrid mode (Bertrand et al., 2019). SemiBin2 v2.2 (Pan et al., 2023) was used for binning of bacterial MAGs which were filtered using CheckM v1.2.2 Chklovski et al. (2023) and GUNC v1.0.6 (Orakov et al., 2021) with threshold values of  $>50\%$  completeness and  $<10\%$  contamination and clade separation scores (CSS)  $< 0.4$ . Finally the MAGs were polished using short-read data and Polypolish v0.6 (Bouras et al., 2024) and dereplicated using dRep v3.5 (Olm et al., 2017). Prokaryotic MAGs were classified using the GTDB v226 database and GTDB-tk v2.4.1 (Chaumeil et al., 2022).

Given the high level of unclassified reads in our initial Kraken classification, we used the new MAGs that had been classified in a second phase of classification. Ideally, we would have built a custom Kraken database. Preliminary experimentation showed that the GTDB database was a better classifier on our data than the Kraken core\_nt. The pre-computed GTDB index for Kraken cannot be used as a basis for a custom database, and it was computationally infeasible

for us to build a custom database from GTDB v226 plus our new MAGs. A [BWA-MEM2](#) index was constructed of the MAGs, and using a [BWA-MEM2](#) version 2.2.1 ([Li and Li, 2020](#)), any reads that had not been mapped by Kraken which mapped to one of the MAGs with an AS flag of at least 140 (93%) was classified using MAGs classification. The disadvantage of this approach is that Bracken cannot be used.

Viral MAGs were assembled, polished and dereplicated in the same way (they were not binned as with relatively short genome size and the use of long-read data we believed that the advantages of binning were outweighed by risks of mis-assembly). We initially generated several hundred MAGs and so focussed only on very high quality MAGs. We used CheckV ([Nayfach et al., 2021](#)) as an initial quality check and chose only high-quality matches ( $\geq 90\%$  completeness,  $\leq 5\%$  contamination). To further validate the viral MAGs, we mapped all the short-read data to the viral MAGS using [BWA-MEM2 v2.2.1](#) ([Li and Li, 2020](#)) and classified support of a MAG as *high quality* if the short-read data of an individual sample gave  $> 80\%$  coverage at a depth  $> 5$ , and as medium quality if the coverage was  $> 40\%$  at a depth  $> 2$ , and otherwise as *not supported*. A viral MAG was accepted if it had high-quality validation from at least two samples, or high quality validation from one sample and three medium-quality validations. We then used [geNomad](#) ([Camargo et al., 2024](#)) and required *virus\_score*  $\geq 0.9$ , at least 3 hallmark genes, at least 90% of the MAG was covered by the short or long-read data for that sample (according to [geNomad](#)) and a marker enrichment score of at least 10.

Since we were only able to classify most of the viral MAGs at class level, we tried three approaches. We report the taxa given by [geNomad](#). We also tested using Kraken 2's viral database, which yielded the same result. We also BLASTed the MAGs against the the JGI IMG\_VR\_2022-12-19\_7.1 database ([Camargo et al., 2022](#)), requiring an 80% identity. identity and coverage of at least 50%. The class classifications were consistent but we were not able to find any match to a specific entry in the database with  $> 80\%$  identity.

### 5.4.3 Supplementary classification of short-reads

Short-reads not classified using Kraken2 were extracted and classified using [BWA-MEM v2.2.1](#) ([Li and Li, 2020](#)) against medium- and high-quality MAGs created from long- and short-read sequences.

## Supplementary information

### Declarations

**Ethics declaration.** Permission for the research was obtained from the National Commission on Research, Science and Technology (NCRST) non-Namibian based research permit number RPIV01052020. Ethical clearance for the larger lion project was obtained through the University of the Witwatersrand Animal Ethical Screening Committee (AESC 2019/04/24C), with a modification added to include the collection of faecal samples for microbiome analysis. Convention on International Trade in Endangered Species of Wild Fauna and Flora (CITES) permits were obtained for export of metagenomic DNA – legally considered as lion tissue – from Namibia and import into South Africa (permit numbers 142695 and 135348). Veterinary clearance (import permit for pathology specimens number 13/1/1/30/2/202306000494) and a section 20 permit for disease control (permit number 24C) were obtained.

**Consent for publication.** Not applicable.

**Availability of data and materials.** The datasets supporting the conclusion of this article are available: in the European Nucleotide Archive as study PRJEB106514 <https://www.ebi.ac.uk/ena/browser/view/PRJEB106514> (data generated by us); comparator lions from [Mittal et al. \(2020\)](#) can be found using NCBI SRA database with the Accession ID SRR9943707-83 under

919 the BioProject ID PRJNA559605.; and fasta files for the 5,596 wild gut microbiome compara-  
920 tor MAGs from Youngblut et al. (2020) can be found at [http://ftp.tue.mpg.de/ebio/projects/  
921 animal\\_gut\\_metagenome\\_assembly/](http://ftp.tue.mpg.de/ebio/projects/animal_gut_metagenome_assembly/).

922 The code use in analysis can be found at <https://github.com/bhattlab/AWIGen2Microbiome>  
923 and <https://github.com/SBIMB/lion-mb>.

924 **Competing interests.** The authors declare that they have no competing interests.  
925

926 **Funding.** This work is based on research supported in part by the National Research Founda-  
927 tion of South Africa (NRF) (Grant Number 145976) so SH. Jakob Wirbel is a Damon Runyon  
928 Quantitative Biology Fellow supported by the Damon Runyon Cancer Research Foundation (DRQ-  
929 22-24). Sample collection was funded by an NRF Thuthuka grant awarded to W. Maartin Strauss  
930 (Grant Number: TTK180418322583). DM was supported by the NIH Fogarty Global Health Equity  
931 Scholars Program (NIH FIC D43TW010540).

932 **Author contributions.** CB performed and managed sample collection and processing, per-  
933 formed bioinformatics pipeline development/analyses and wrote the first draft of the paper, JW  
934 and DM assisted with bioinformatics pipeline development and advised on analytic strategy, NC  
935 and AvC were responsible for long-read sequencing, WMS facilitated fieldwork and sample collec-  
936 tion, WMS, JB and JM co-ordinated and facilitated collaborations within the larger lion projects,  
937 RSS co-supervised/conceived the project, SH co-supervised/conceived the project and performed  
938 bioinformatics pipeline development/analyses. All authors commented on drafts of the paper and  
939 approved the final version.  
940

941 **Acknowledgements.** The authors acknowledge the Centre for High Performance Computing,  
942 South Africa, for providing computational resources to this research project (CBBI0930). The  
943 authors also express their gratitude to the teams at the Etosha Ecological Institute, Ongava  
944 Research Center, and the Leibniz Institute for Zoo and Wildlife Research for logistical support in  
945 storing and collecting samples, specifically Stéphanie Périquet, Werner Kilian, and William Vers-  
946 feld. Additional thanks to Axel Hartman and Ortwin Aschenborn for their veterinary expertise in  
947 immobilising lions for sample collection. We are very grateful to Kiara Haylock and Ciara Ball  
948 for their enthusiastic and essential support of the fieldwork and sample collection, and to Natalie  
949 Smyth and the SBIMB Biobank and Project Office for their logistic and laboratory support.  
950

## 951 **References**

952  
953 McKenney EA, Koelle K, Dunn RR, Yoder AD. The ecosystem services of animal microbiomes.  
954 *Molecular Ecology*. 2018;27(8):2164–2172. Publisher: John Wiley & Sons, Ltd. [https://doi.  
955 org/10.1111/MEC.14532](https://doi.org/10.1111/MEC.14532).

956  
957 Trevelline BK, Fontaine SS, Hartup BK, Kohl KD. Conservation biology needs a microbial  
958 renaissance: a call for the consideration of host-associated microbiota in wildlife management  
959 practices. *Proceedings of the Royal Society B*. 2019;286(1895). Publisher: The Royal Society.  
960 <https://doi.org/10.1098/RSPB.2018.2448>.

961  
962 Almeida A, Mitchell AL, Boland M, Forster SC, Gloor GB, Tarkowska A, et al. A new genomic  
963 blueprint of the human gut microbiota. *Nature*. 2019;568(7753):499–504. [https://doi.org/10.  
964 1038/s41586-019-0965-1](https://doi.org/10.1038/s41586-019-0965-1).

965  
966 Walter J, Armet AM, Finlay BB, Shanahan F. Establishing or exaggerating causality for the gut  
967 microbiome: lessons from human microbiota-associated rodents. *Cell*. 2020;180(2):221–232.  
968 Publisher: Cell Press. <https://doi.org/10.1016/J.CELL.2019.12.025>.

969  
970 Paleo-López R, Ugarte CS, Stuardo CJ, Silva AX, Napolitano C. Human landscape disturbance and  
971 wildlife gut microbiota: global knowledge gaps. *PeerJ*. 2026;14:e20545.  
972

|                                                                                                                                                                                                                                                                                                                                                                                                                                                                                                                   |                                              |
|-------------------------------------------------------------------------------------------------------------------------------------------------------------------------------------------------------------------------------------------------------------------------------------------------------------------------------------------------------------------------------------------------------------------------------------------------------------------------------------------------------------------|----------------------------------------------|
| Bahrndorff S, Alemu T, Alemneh T, Lund Nielsen J. The microbiome of animals: implications for conservation biology. <i>International journal of genomics</i> . 2016;2016. Publisher: Int J Genomics. <a href="https://doi.org/10.1155/2016/5304028">https://doi.org/10.1155/2016/5304028</a> .                                                                                                                                                                                                                    | 973<br>974<br>975<br>976                     |
| West AG, Waite DW, Deines P, Bourne DG, Digby A, McKenzie VJ, et al. The microbiome in threatened species conservation. <i>Biological Conservation</i> . 2019;229:85–98. Publisher: Elsevier. <a href="https://doi.org/10.1016/J.BIOCON.2018.11.016">https://doi.org/10.1016/J.BIOCON.2018.11.016</a> .                                                                                                                                                                                                           | 977<br>978<br>979<br>980                     |
| Guo W, Ren K, Ning R, Li C, Zhang H, Li D, et al. Fecal microbiota transplantation provides new insight into wildlife conservation. <i>Global Ecology and Conservation</i> . 2020;24:e01234. Publisher: Elsevier. <a href="https://doi.org/https://doi.org/10.1016/j.gecco.2020.e01234">https://doi.org/https://doi.org/10.1016/j.gecco.2020.e01234</a> .                                                                                                                                                         | 981<br>982<br>983<br>984                     |
| Bornbusch SL, Crosier A, Gentry L, Delaski KM, Maslanka M, Muletz-Wolz CR. Fecal microbiota transplants facilitate post-antibiotic recovery of gut microbiota in cheetahs ( <i>Acinonyx jubatus</i> ). <i>Communications Biology</i> . 2024;7(1):1689.                                                                                                                                                                                                                                                            | 985<br>986<br>987<br>988                     |
| Nkera-Gutabara CK, Kerr R, Scholefield J, Hazelhurst S, Naidoo J. Microbiomics: the next pillar of precision medicine and its role in African healthcare. <i>Frontiers in Genetics</i> . 2022;13:616. Publisher: Frontiers Media S.A.. <a href="https://doi.org/https://doi.org/10.3389/fgene.2022.869610">https://doi.org/https://doi.org/10.3389/fgene.2022.869610</a> .                                                                                                                                        | 989<br>990<br>991<br>992                     |
| Amato KR, Yeoman CJ, Kent A, Righini N, Carbonero F, Estrada A, et al. Habitat degradation impacts black howler monkey ( <i>Alouatta pigra</i> ) gastrointestinal microbiomes. <i>The ISME Journal</i> 2013 7:7. 2013;7(7):1344–1353. Publisher: Nature Publishing Group. <a href="https://doi.org/10.1038/ismej.2013.16">https://doi.org/10.1038/ismej.2013.16</a> .                                                                                                                                             | 993<br>994<br>995<br>996                     |
| Teyssier A, Rouffaer LO, Saleh Hudin N, Strubbe D, Matthysen E, Lens L, et al. Inside the guts of the city: Urban-induced alterations of the gut microbiota in a wild passerine. <i>Science of The Total Environment</i> . 2018;612:1276–1286. Publisher: Elsevier. <a href="https://doi.org/10.1016/J.SCITOTENV.2017.09.035">https://doi.org/10.1016/J.SCITOTENV.2017.09.035</a> .                                                                                                                               | 997<br>998<br>999<br>1000                    |
| Dallas J, Warne R. Captivity and animal microbiomes: potential roles of microbiota for influencing animal conservation. <i>Microbial ecology</i> . 2023;85(3):820–838. Publisher: Springer.                                                                                                                                                                                                                                                                                                                       | 1001<br>1002<br>1003<br>1004                 |
| Maritan E, Quagliariello A, Frago E, Patarnello T, Martino ME. The role of animal hosts in shaping gut microbiome variation. <i>Philosophical Transactions of the Royal Society B</i> . 2024;379(1901):20230071.                                                                                                                                                                                                                                                                                                  | 1005<br>1006<br>1007<br>1008                 |
| Zoelzer F, Burger AL, Dierkes PW. Unraveling differences in fecal microbiota stability in mammals: from high variable carnivores and consistently stable herbivores. <i>Animal Microbiome</i> . 2021;3(1):77.                                                                                                                                                                                                                                                                                                     | 1009<br>1010<br>1011<br>1012                 |
| Hoeks S, Huijbregts MAJ, Busana M, Harfoot MJB, Svenning JC, Santini L. Mechanistic insights into the role of large carnivores for ecosystem structure and functioning. <i>Ecography</i> . 2020;43(12):1752–1763. eprint: <a href="https://onlinelibrary.wiley.com/doi/pdf/10.1111/ecog.05191">https://onlinelibrary.wiley.com/doi/pdf/10.1111/ecog.05191</a> . <a href="https://doi.org/10.1111/ecog.05191">https://doi.org/10.1111/ecog.05191</a> .                                                             | 1013<br>1014<br>1015<br>1016<br>1017         |
| Sergio F, Caro T, Brown D, Clucas B, Hunter J, Ketchum J, et al. Top predators as conservation tools: ecological rationale, assumptions, and efficacy. <i>Annual Review of Ecology, Evolution, and Systematics</i> . 2008;39(1):1–19. eprint: <a href="https://doi.org/10.1146/annurev.ecolsys.39.110707.173545">https://doi.org/10.1146/annurev.ecolsys.39.110707.173545</a> . <a href="https://doi.org/10.1146/annurev.ecolsys.39.110707.173545">https://doi.org/10.1146/annurev.ecolsys.39.110707.173545</a> . | 1018<br>1019<br>1020<br>1021<br>1022<br>1023 |
| Lwin YH, Quan RC, Hartig F, Kühl HS, Heurich M. Human and apex predators shape lower trophic levels through top-down control. <i>Biological Conservation</i> . 2025;310:111352.                                                                                                                                                                                                                                                                                                                                   | 1024<br>1025<br>1026                         |

1027 de Jonge N, Carlsen B, Christensen MH, Pertoldi C, Nielsen JL. The gut microbiome of 54 mam-  
1028 malian species. *Frontiers in Microbiology*. 2022;13. <https://doi.org/https://doi.org/10.3389/fmicb.2022.886252de>.  
1029  
1030  
1031 Zhu L, Wu Q, Deng C, Zhang M, Zhang C, Chen H, et al. Adaptive evolution to a high purine  
1032 and fat diet of carnivorans revealed by gut microbiomes and host genomes. *Environmental*  
1033 *microbiology*. 2018;20(5):1711–1722. Publisher: Environ Microbiol. [https://doi.org/10.1111/](https://doi.org/10.1111/1462-2920.14096)  
1034 [1462-2920.14096](https://doi.org/10.1111/1462-2920.14096).  
1035  
1036 Levin D, Raab N, Pinto Y, Rothschild D, Zanir G, Godneva A, et al. Diversity and functional  
1037 landscapes in the microbiota of animals in the wild. *Science*. 2021;372(6539):eabb5352. Pub-  
1038 lisher: American Association for the Advancement of Science. [https://doi.org/10.1126/science.](https://doi.org/10.1126/science.abb5352)  
1039 [abb5352](https://doi.org/10.1126/science.abb5352).  
1040  
1041 Wu X, Wei Q, Wang X, Shang Y, Zhang H. Evolutionary and dietary relationships of wild mammals  
1042 based on the gut microbiome. *Gene*. 2022;808:145999. [https://doi.org/10.1016/j.gene.2021.](https://doi.org/10.1016/j.gene.2021.145999)  
1043 [145999](https://doi.org/10.1016/j.gene.2021.145999).  
1044  
1045 Youngblut ND, de la Cuesta-Zuluaga J, Reischer GH, Dauser S, Schuster N, Walzer C, et al. Large-  
1046 scale metagenome assembly reveals novel animal-associated microbial genomes, biosynthetic  
1047 gene clusters, and other genetic diversity. *mSystems*. 2020;5(6):10.1128/msystems.01045–  
1048 20. Publisher: American Society for Microbiology. [https://doi.org/https://doi.org/10.1128/](https://doi.org/https://doi.org/10.1128/msystems.01045-20)  
1049 [msystems.01045-20](https://doi.org/10.1128/msystems.01045-20).  
1050  
1051 Mittal P, Saxena R, Gupta A, Mahajan S, Sharma VK. The gene catalog and comparative analysis  
1052 of gut microbiome of big cats provide new insights on Panthera species. *Frontiers in Microbiol-*  
1053 *ogy*. 2020;11:1012. Publisher: Frontiers Media S.A.. [https://doi.org/https://doi.org/10.3389/](https://doi.org/https://doi.org/10.3389/fmicb.2020.01012)  
1054 [fmicb.2020.01012](https://doi.org/10.3389/fmicb.2020.01012).  
1055  
1056 Sun M, Cuyper AD, Zhang Y, Clauss M, Fens A, van Sonsbeek LB, et al. Cuts or carcasses? Diet  
1057 form affects fecal microbial and animal fiber fractions in a large carnivore, the Asiatic lion. *PLoS*  
1058 *One*;20(10):e0335173.  
1059  
1060 Chaumeil PA, Mussig AJ, Hugenholtz P, Parks DH. GTDB-Tk v2: memory friendly classification  
1061 with the genome taxonomy database. *Bioinformatics*. 2022;38(23):5315–5316. [https://doi.](https://doi.org/10.1093/bioinformatics/btac672)  
1062 [org/10.1093/bioinformatics/btac672](https://doi.org/10.1093/bioinformatics/btac672).  
1063  
1064 PLAZA ONATE F.: A catalog of genes, genomes and species of the cat (*Felis catus*) intestinal  
1065 microbiota. Recherche Data Gouv. Available from: <https://doi.org/10.57745/1FIHIT>.  
1066  
1067 Nayfach S, Shi ZJ, Seshadri R, Pollard KS, Kyrpides NC. New insights from uncultivated genomes  
1068 of the global human gut microbiome. *Nature*. 2019;568(7753):505–510. Number: 7753  
1069  
1070 Publisher: Nature Publishing Group. <https://doi.org/10.1038/s41586-019-1058-x>.  
1071  
1072 Karlsson F, Ussery D, Nielsen J, Nookaew I. A closer look at Bacteroides: phylogenetic relationship  
1073 and genomic implications of a life in the human gut. *Microbial Ecology*. 2011;61(3):473–485.  
1074  
1075 <https://doi.org/10.1007/s00248-010-9796-1>.  
1076  
1077 Houtman TA, Eckermann HA, Smidt H, de Weerth C. Gut microbiota and BMI throughout  
1078 childhood: the role of firmicutes, bacteroidetes, and short-chain fatty acid producers. *Scien-*  
1079 *tific Reports*. 2022;12(1):3140. Publisher: Nature Publishing Group. [https://doi.org/10.1038/](https://doi.org/10.1038/s41598-022-07176-6)  
1080 [s41598-022-07176-6](https://doi.org/10.1038/s41598-022-07176-6).

<https://doi.org/10.1126/science.1208344>. 1081

Menke S, Meier M, Melzheimer J, Mfunne JKE, Heinrich S, Thalwitzer S, et al. Oligotyping reveals differences between gut microbiomes of free-ranging sympatric Namibian carnivores (*Acinonyx jubatus*, *Canis mesomelas*) on a bacterial species-like level. *Frontiers in microbiology*. 2014;5:526. Publisher: Frontiers Media SA. <https://doi.org/https://doi.org/10.3389/fmicb.2014.00526>. 1082  
1083  
1084  
1085  
1086  
1087

Zhang H, Chen L. Phylogenetic analysis of 16S rRNA gene sequences reveals distal gut bacterial diversity in wild wolves (*Canis lupus*). *Molecular Biology Reports*. 2010;37(8):4013–4022. <https://doi.org/10.1007/s11033-010-0060-z>. 1088  
1089  
1090  
1091

Rojas CA, Holekamp KE, Viladomat Jasso M, Souza V, Eisen JA, Theis KR. Taxonomic, genomic, and functional variation in the gut microbiomes of wild spotted hyenas across 2 decades of study. *mSystems*. 2022;8(1):e00965–22. Publisher: American Society for Microbiology. <https://doi.org/https://doi.org/10.1128/msystems.00965-22>. 1092  
1093  
1094  
1095  
1096

Wasimuddin, Menke S, Melzheimer J, Thalwitzer S, Heinrich S, Wachter B, et al. Gut microbiomes of free-ranging and captive Namibian cheetahs: Diversity putative functions and occurrence of potential pathogens. *Molecular Ecology*. 2017;26:5515–5576. <https://doi.org/https://doi.org/10.1111/mec.14278WASIMUDDINETAL.5527>. 1097  
1098  
1099  
1100  
1101

Hilborn A, Pettorelli N, Caro T, Kelly M, Laurenson M, Durant S. Cheetahs modify their prey handling behavior depending on risks from top predators. *Behavioral Ecology and Sociobiology*. 2018;72(4):74. <https://doi.org/10.1007/s00265-018-2481-y>. 1102  
1103  
1104  
1105

Barber-Meyer S, Mech L, Newton W, Borg B. Differential wolf-pack-size persistence and the role of risk when hunting dangerous prey. *Behaviour*. 2016;153(12):1473–1487. Publisher: Brill. <https://doi.org/10.1163/1568539X-00003391>. 1106  
1107  
1108  
1109

Hayward MW, Kerley GIH. Prey preferences and dietary overlap amongst Africa's large predators : research article. *South African Journal of Wildlife Research*. 2008;38(2):93–108. Publisher: Southern African Wildlife Management Association (SAWMA). <https://doi.org/10.10520/EJC117300>. 1110  
1111  
1112  
1113  
1114

Sarkar A, Harty S, Johnson KVA, Moeller AH, Archie EA, Schell LD, et al. Microbial transmission in animal social networks and the social microbiome. *Nature Ecology & Evolution*. 2020;4(8):1020–1035. Publisher: Nature Publishing Group. <https://doi.org/10.1038/s41559-020-1220-8>. 1115  
1116  
1117  
1118  
1119

Logan K, Sweanor L, Hornocker M, Negri S. Behavior and social organization of a solitary carnivore. *Cougar ecology and conservation* (M Hornocker and S Negri, eds) University of Chicago Press, Chicago, Illinois. 2010;p. 105–117. 1120  
1121  
1122

Smith JE, Memenis SK, Holekamp KE. Rank-related partner choice in the fission–fusion society of the spotted hyena (*Crocuta crocuta*). *Behavioral Ecology and Sociobiology*. 2007;61(5):753–765. <https://doi.org/10.1007/s00265-006-0305-y>. 1123  
1124  
1125  
1126

Sun M, De Cuyper A, Zhang Y, Clauss M, Fens A, Bruins-van Sonsbeek LG, et al. Cuts or carcasses? Diet form affects fecal microbial and animal fiber fractions in a large carnivore, the Asiatic lion. *PLoS One*. 2025;20(10):e0335173. 1127  
1128  
1129  
1130

Parks DH, Chuvochina M, Waite DW, Rinke C, Skarshewski A, Chaumeil PA, et al. A standardized bacterial taxonomy based on genome phylogeny substantially revises the tree of life. *Nature biotechnology*. 2018;36(10):996–1004. 1131  
1132  
1133  
1134

1135 Goertz S, Menezes ABd, Birtles RJ, Fenn J, Lowe AE, MacColl ADC, et al. Geographical location  
1136 influences the composition of the gut microbiota in wild house mice (*Mus musculus domesticus*)  
1137 at a fine spatial scale. *PLOS ONE*. 2019;14(9):e0222501. Publisher: Public Library of Science.  
1138 <https://doi.org/10.1371/journal.pone.0222501>.  
1139  
1140 Adams NE, Becker MA, Edmands S. Effect of Geography and Captivity on Scat Bacterial Com-  
1141 munities in the Imperiled Channel Island Fox. *Frontiers in Microbiology*. 2021;12. Publisher:  
1142 Frontiers. <https://doi.org/10.3389/fmicb.2021.748323>.  
1143  
1144 Colborn AS, Kuntze CC, Gadsden GI, Harris NC. Spatial variation in diet–microbe associations  
1145 across populations of a generalist North American carnivore. *Journal of Animal Ecology*.  
1146 2020;89(8):1952–1960. <https://doi.org/10.1111/1365-2656.13266>.  
1147  
1148 de Manuel M, Barnett R, Sandoval-Velasco M, Yamaguchi N, Garrett Vieira F, Zepeda Mendoza ML,  
1149 et al. The evolutionary history of extinct and living lions. *Proceedings of the National Academy*  
1150 *of Sciences*. 2020;117(20):10927–10934. Publisher: Proceedings of the National Academy of  
1151 Sciences. <https://doi.org/10.1073/pnas.1919423117>.  
1152  
1153 Schlomann BH, Parthasarathy R. Timescales of gut microbiome dynamics. *Current opinion in*  
1154 *microbiology*. 2019;50:56–63.  
1155  
1156 de la Cuesta-Zuluaga J, Ley RE, Youngblut ND. Struo: a pipeline for building custom databases  
1157 for common metagenome profilers. *Bioinformatics*. 2020;36(7):2314–2315. [https://doi.org/](https://doi.org/10.1093/bioinformatics/btz899)  
1158 [10.1093/bioinformatics/btz899](https://doi.org/10.1093/bioinformatics/btz899).  
1159  
1160 Richter M, Rosselló-Móra R. Shifting the genomic gold standard for the prokaryotic species  
1161 definition. *Proceedings of the National Academy of Sciences*. 2009;106(45):19126–19131.  
1162  
1163 Borstlap DG. Intake and digestibility studies with captive African lions (*Panthera leo*), leopards  
1164 (*Panthera pardus*) and cheetahs (*Acinonyx jubatus*). PhD diss, University of the Free State.  
1165 2002;Publisher: University of the Free State.  
1166  
1167 Zubareva V, Lapashina A, Shugaeva T, Litvin A, Feniouk B. Rotary ion-translocating ATPases/ATP  
1168 synthases: diversity, similarities, and differences. *Biochemistry (Moscow)*. 2020;85(12):1613–  
1169 1630.  
1170  
1171 Barathan M, Ng SL, Lokanathan Y, Ng MH, Law JX. The profound influence of gut microbiome  
1172 and extracellular vesicles on animal health and disease. *International Journal of Molecular*  
1173 *Sciences*. 2024;25(7):4024.  
1174  
1175 Gupta R, Gupta N. Glycolysis and gluconeogenesis. In: *Fundamentals of bacterial physiology and*  
1176 *metabolism*. Springer; 2021. p. 267–287.  
1177  
1178 Ragsdale SW, Pierce E. Acetogenesis and the Wood–Ljungdahl pathway of CO<sub>2</sub> fixation. *Biochimica et Biophysica Acta (BBA)-Proteins and Proteomics*. 2008;1784(12):1873–1898.  
1179  
1180 Asplund-Samuelsson J, Hudson EP. Wide range of metabolic adaptations to the acquisition of  
1181 the Calvin cycle revealed by comparison of microbial genomes. *PLoS computational biology*.  
1182 2021;17(2):e1008742.  
1183  
1184 Herring C, Bazer F, Wu G. Amino acid nutrition for optimum growth, development, reproduction,  
1185 and health of zoo animals. In: Wu G, editor. *Amino acids in nutrition and health: amino acids*  
1186 *in the nutrition of companion, zoo and farm animals*. Springer International Publishing; 2021.  
1187 p. 233–253.  
1188

|                                                                                                                                                                                                                                                                                                                                                                                                                                                                                                     |                                              |
|-----------------------------------------------------------------------------------------------------------------------------------------------------------------------------------------------------------------------------------------------------------------------------------------------------------------------------------------------------------------------------------------------------------------------------------------------------------------------------------------------------|----------------------------------------------|
| Lafferty DJ, Gillman SJ, Jeakle LK, Roell BJ, McKenney EA. Mink ( <i>Neovison vison</i> ) fecal microbiomes are influenced by sex, temperature, and time postdefecation. <i>Journal of Mammalogy</i> . 2022;103(2):316–327.                                                                                                                                                                                                                                                                         | 1189<br>1190<br>1191<br>1192                 |
| Pafčo B, Sharma AK, Petrželková KJ, Vlčková K, Todd A, Yeoman CJ, et al. Gut microbiome composition of wild western lowland gorillas is associated with individual age and sex factors. <i>American Journal of Physical Anthropology</i> . 2019;169(3):575–585. eprint: <a href="https://onlinelibrary.wiley.com/doi/pdf/10.1002/ajpa.23842">https://onlinelibrary.wiley.com/doi/pdf/10.1002/ajpa.23842</a> . <a href="https://doi.org/10.1002/ajpa.23842">https://doi.org/10.1002/ajpa.23842</a> . | 1193<br>1194<br>1195<br>1196<br>1197<br>1198 |
| Wu X, Zhang H, Chen J, Shang S, Wei Q, Yan J, et al. Comparison of the fecal microbiota of dholes high-throughput Illumina sequencing of the V3–V4 region of the 16S rRNA gene. <i>Applied microbiology and biotechnology</i> . 2016;100(8):3577–3586.                                                                                                                                                                                                                                              | 1199<br>1200<br>1201<br>1202                 |
| Degnan PH, Pusey AE, Lonsdorf EV, Goodall J, Wroblewski EE, Wilson ML, et al. Factors associated with the diversification of the gut microbial communities within chimpanzees from Gombe National Park. <i>Proceedings of the National Academy of Sciences</i> . 2012;109(32):13034–13039.                                                                                                                                                                                                          | 1203<br>1204<br>1205<br>1206                 |
| Rubenstein DI, Wrangham RW. <i>Ecological aspects of social evolution: birds and mammals</i> . Princeton University Press; 2014. Google-Books-ID: Ou_AwAAQBAJ.                                                                                                                                                                                                                                                                                                                                      | 1207<br>1208                                 |
| Kelly BJ, Gross R, Bittinger K, Sherrill-Mix S, Lewis JD, Collman RG, et al. Power and sample-size estimation for microbiome studies using pairwise distances and PERMANOVA. <i>Bioinformatics</i> . 2015;31(15):2461–2468.                                                                                                                                                                                                                                                                         | 1209<br>1210<br>1211<br>1212                 |
| Heydinger J, Packer C. The historical effects of infrastructure development on the lion population of Etosha National Park, Namibia. <i>Namibian Journal of Environment</i> . 2022;6:22–36.                                                                                                                                                                                                                                                                                                         | 1213<br>1214<br>1215                         |
| Turner W, Périquet S, Goelst C, Vera K, Cameron E, Alexander K, et al. Africa’s drylands in a changing world: Challenges for wildlife conservation under climate and land-use changes in the Greater Etosha Landscape. <i>Global Ecology and Conservation</i> . 2022;38:e02221. <a href="https://doi.org/10.1016/j.gecco.2022.e02221">https://doi.org/10.1016/j.gecco.2022.e02221</a> .                                                                                                             | 1216<br>1217<br>1218<br>1219<br>1220         |
| Illumina.: <i>Illumina DNA Prep Reference Guide</i> . <a href="https://emea.support.illumina.com/downloads/illumina-dna-prep-reference-guide-1000000025416.html">https://emea.support.illumina.com/downloads/illumina-dna-prep-reference-guide-1000000025416.html</a> .                                                                                                                                                                                                                             | 1221<br>1222                                 |
| Oxford Nanopore.: <i>Pod5 Documentation</i> . Version 0.3.5. <a href="https://software-docs.nanoporetech.com/pod5/">https://software-docs.nanoporetech.com/pod5/</a> .                                                                                                                                                                                                                                                                                                                              | 1223<br>1224<br>1225                         |
| Nanopore O.: <i>Dorado</i> . Version 0.8.0. <a href="https://github.com/nanoporetech/dorado">https://github.com/nanoporetech/dorado</a> .                                                                                                                                                                                                                                                                                                                                                           | 1226<br>1227                                 |
| Krueger F. <i>Trim Galore!</i> : A wrapper around Cutadapt and FastQC to consistently apply adapter and quality trimming to FastQ files, with extra functionality for RRBS data. Babraham Institute. 2015;.                                                                                                                                                                                                                                                                                         | 1228<br>1229<br>1230<br>1231                 |
| Li J, Li S. Energy investment, economic growth and carbon emissions in China—Empirical analysis based on spatial Durbin model. <i>Energy Policy</i> . 2020;140:111425.                                                                                                                                                                                                                                                                                                                              | 1232<br>1233<br>1234                         |
| Ewels P, Magnusson M, Lundin S, Käller M. MultiQC: summarize analysis results for multiple tools and samples in a single report. <i>Bioinformatics</i> . 2016;32(19):3047–3048.                                                                                                                                                                                                                                                                                                                     | 1235<br>1236<br>1237                         |
| Wood DE, Lu J, Langmead B. Improved metagenomic analysis with Kraken 2. <i>Genome Biology</i> . 2019;20(1):257. <a href="https://doi.org/10.1186/s13059-019-1891-0">https://doi.org/10.1186/s13059-019-1891-0</a> .                                                                                                                                                                                                                                                                                 | 1238<br>1239<br>1240                         |
| Lu J, Breitwieser F, Thielen P, Salzberg S. Bracken: estimating species abundance in metagenomics data. <i>PeerJ Computer Science</i> . 2017;3:e104. Publisher: PeerJ Inc.. <a href="https://doi.org/10.7717/">https://doi.org/10.7717/</a>                                                                                                                                                                                                                                                         | 1241<br>1242                                 |

1243 [peerj-cs.104](#).  
1244  
1245 Li Z, Zhou J, Liang H, Ye L, Lan L, Lu F, et al. Differences in alpha diversity of gut microbiota  
1246 in neurological diseases. *Frontiers in Neuroscience*. 2022;16. [https://doi.org/10.3389/fnins.](https://doi.org/10.3389/fnins.2022.879318)  
1247 [2022.879318](https://doi.org/10.3389/fnins.2022.879318).  
1248  
1249 Letunic I, Bork P. Interactive Tree Of Life (iTOL): an online tool for phylogenetic tree display and  
1250 annotation. *Bioinformatics*. 2007;23(1):127–128.  
1251  
1252 Moore MP, Wilcox MH, Walker AS, Eyre DW. K-mer based prediction of *Clostridioides difficile*  
1253 relatedness and ribotypes. *Microbial Genomics*. 2022;8(4):000804.  
1254  
1255 Kang DD, Li F, Kirton E, Thomas A, Egan R, An H, et al. MetaBAT 2: an adaptive binning algo-  
1256 rithm for robust and efficient genome reconstruction from metagenome assemblies. *PeerJ*.  
1257 2019;7:e7359. Publisher: PeerJ Inc.. <https://doi.org/10.7717/peerj.7359>.  
1258  
1259 Wu YW, Simmons BA, Singer SW. MaxBin 2.0: an automated binning algorithm to recover  
1260 genomes from multiple metagenomic datasets. *Bioinformatics*. 2016;32(4):605–607. <https://doi.org/10.1093/bioinformatics/btv638>.  
1261  
1262 Alneberg J, Bjarnason BS, de Bruijn I, Schirmer M, Quick J, Ijaz UZ, et al. CONCOCT: clustering  
1263 contigs on coverage and composition. *arXiv preprint arXiv:13124038*. 2013;.  
1264  
1265 Sieber CMK, Probst AJ, Sharrar A, Thomas BC, Hess M, Tringe SG, et al. Recovery of genomes  
1266 from metagenomes via a dereplication, aggregation and scoring strategy. *Nature Microbiology*.  
1267 2018;3(7):836–843. Number: 7 Publisher: Nature Publishing Group. [https://doi.org/10.1038/](https://doi.org/10.1038/s41564-018-0171-1)  
1268 [s41564-018-0171-1](https://doi.org/10.1038/s41564-018-0171-1).  
1269  
1270 Hyatt D, Chen GL, LoCascio PF, Land ML, Larimer FW, Hauser LJ. Prodigal: prokaryotic gene  
1271 recognition and translation initiation site identification. *BMC Bioinformatics*. 2010;11(1):119.  
1272 <https://doi.org/10.1186/1471-2105-11-119>.  
1273  
1274 Kanehisa M, Sato Y, Morishima K. BlastKOALA and GhostKOALA: KEGG tools for func-  
1275 tional characterization of genome and metagenome sequences. *Journal of molecular biology*.  
1276 2016;428(4):726–731.  
1277  
1278 Shaffer M, Borton MA, McGivern BB, Zayed AA, La Rosa SL, Solden LM, et al. DRAM for distilling  
1279 microbial metabolism to automate the curation of microbiome function. *Nucleic acids research*.  
1280 2020;48(16):8883–8900.  
1281  
1282 Bertrand D, Shaw J, Kalathiyappan M, Ng A, Kumar M, Li C, et al. Hybrid metagenomic  
1283 assembly enables high-resolution analysis of resistance determinants and mobile elements in  
1284 human microbiomes. *Nature Biotechnology*. 2019;37(8):937–944. [https://doi.org/10.1038/](https://doi.org/10.1038/s41587-019-0191-2)  
1285 [s41587-019-0191-2](https://doi.org/10.1038/s41587-019-0191-2).  
1286  
1287 Pan S, Zhao XM, Coelho L. SemiBin2: self-supervised contrastive learning leads to better MAGs  
1288 for short- and long-read sequencing. *Bioinformatics*. 2023 06;39:i21–i29. [https://doi.org/10.](https://doi.org/10.1093/bioinformatics/btad209)  
1289 [1093/bioinformatics/btad209](https://doi.org/10.1093/bioinformatics/btad209).  
1290  
1291 Chklovski A, Parks D, Woodcroft B, Tyson G. CheckM2: a rapid, scalable and accurate  
1292 tool for assessing microbial genome quality using machine learning. *Nature Methods*.  
1293 2023;20(8):1203–1212. Publisher: Nature Publishing Group US New York.  
1294  
1295 Orakov A, Fullam A, Coelho L, Khedkar S, Szklarczyk D, Mende D, et al. GUNC: detection of  
1296 chimerism and contamination in prokaryotic genomes. *Genome Biology*. 2021;22(1):178. <https://doi.org/10.1186/s13059-021-02393-0>.

Bouras G, Judd L, Edwards R, Vreugde S, Stinear T, Wick R. How low can you go? Short-read polishing of Oxford Nanopore bacterial genome assemblies [Journal Article]. *Microbial Genomics*. 2024;10(6). <https://doi.org/https://doi.org/10.1099/mgen.0.001254>. 1297  
1298  
1299  
1300

Olm M, Brown C, Brooks B, Banfield J. dRep: a tool for fast and accurate genomic comparisons that enables improved genome recovery from metagenomes through de-replication. *ISME Journal*. 2017;11(12):2864–2868. <https://doi.org/10.1038/ismej.2017.126>. 1301  
1302  
1303  
1304

Nayfach S, Camargo A, Schulz F, Eloie-Fadrosch E, Roux S, Kyrpides N. CheckV assesses the quality and completeness of metagenome-assembled viral genomes. *Nature Biotechnology*. 2021;39(5):578–585. <https://doi.org/10.1038/s41587-020-00774-7>. 1305  
1306  
1307  
1308

Camargo A, Roux S, Schulz F, Xu Y, Bin H, Chain P, et al. Identification of mobile genetic elements with geNomad. *Nature Biotechnology*. 2024;42(8):1303–1312. 1309  
1310  
1311

Camargo A, Nayfach S, Chen IM, Palaniappan K, Ratner A, Chu K, et al. IMG/VR v4: an expanded database of uncultivated virus genomes within a framework of extensive functional, taxonomic, and ecological metadata. *Nucleic Acids Research*. 2022 11;51(D1):D733–D743. <https://doi.org/10.1093/nar/gkac1037>. <https://academic.oup.com/nar/article-pdf/51/D1/D733/48441232/gkac1037.pdf>. 1312  
1313  
1314  
1315  
1316

## A Supplementary material

1317  
1318  
1319  
1320  
1321  
1322  
1323  
1324  
1325  
1326  
1327  
1328  
1329  
1330  
1331  
1332  
1333  
1334  
1335  
1336  
1337  
1338  
1339  
1340  
1341  
1342  
1343  
1344  
1345  
1346  
1347  
1348  
1349  
1350
